1 **Modeling PPRV pathogenesis in mice to assess the contribution of innate cells**  
2 **and anti-viral T cells**

3

4

5

6 Yashu Sharma<sup>1,5</sup>, Roman Sarkar<sup>1,5</sup>, Ayush Jain<sup>1</sup>, Sudhakar Singh<sup>1</sup>, Chander Shekhar<sup>1</sup>,  
7 ChandraSekar Shanmugam<sup>2</sup>, Muthuchelvan Dhanavelu<sup>2</sup>, Prabhakar Tembure<sup>3</sup>, Rajeev  
8 Kaul<sup>4\*</sup>, Sharvan Sehrawat<sup>1\*</sup>

9

10

11 <sup>1</sup>Department of Biological Sciences  
12 Indian Institute of Science Education and Research Mohali  
13 Sector 81, SAS Nagar Knowledge City  
14 PO Manauli Mohali 140306 Punjab India

15

16 <sup>2</sup>Division of Virology  
17 Indian Veterinary Research Institute  
18 Mukteshwar UK  
19 <sup>3</sup>Department of Veterinary Microbiology  
20 Nagpur Veterinary College  
21 Nagpur MH 440001

22

23 <sup>4</sup>Department of Microbiology  
24 University of Delhi South Campus  
25 Benito Suarez Road New Delhi 110021

26

27 <sup>5</sup>These authors contributed equally to the work. The author order is decided by the  
28 seniority of authors.

29

30

31

32 **Running title:** Susceptibility and pathogenesis of PPRV in mice.

33

34

35 \*Address for correspondence  
36 sharvan@iisermohali.ac.in or rkaul@south.du.ac.in

37

38 **Conflict of financial interest:**

39 The authors declare no conflict of financial interest.

40 The study was supported by extramural grant from National Agriculture Science Fund  
41 (NASF/ABA-6021/2017-18).

42 **Abstract**

43 We demonstrate a rapid induction of type I IFN response in PPRV stimulated cells  
44 and the susceptibility of mice, genetically ablated of interferon response, to PPRV  
45 infection. Following PPRV infection, IFNR KO mice gradually reduced their body  
46 weights and succumbed to the infection within 10 days. While the infecting inoculum  
47 size did not alter the outcome of infection, the nature of the induced disease was  
48 qualitatively different. Immunopathological lesions were characterized by the  
49 expansion and infiltration of innate immune cells distinctly evident at the lower  
50 infecting dose of PPRV infection. The replicating virus particles as well as the viral  
51 antigens were abundant in most of the critical organs of PPRV infected IFNR KO  
52 mice. Neutrophils and macrophages transported the replicating virus to central  
53 nervous system and contributed to pathology while the NK cells and T cells were  
54 protective against the virus. Using an array of fluorescently labeled H-2K<sup>b</sup> tetramers  
55 PPRV specific CD8<sup>+</sup> T cells responses were identified and measured in the infected  
56 as well as the peptide immunized mice. Our study therefore established and  
57 employed a laboratory animal model for investigating PPRV pathogenesis and the  
58 contribution of virus specific CD8<sup>+</sup> T cells during the virus infection to pave the way  
59 for elucidating protective or pathological roles of immune cells during PPRV  
60 infection.

61

62 **Importance**

63 We developed a laboratory animal model for investigating the pathogenesis and  
64 immunity induced by PPRV. IFNR KO animals succumbed to the infection  
65 irrespective of the dose and the route of infection. Neutrophils and macrophages  
66 served as the Trojan horse and helped transport the virus to CNS to cause encephalitis  
67 while the NK cells and CD8<sup>+</sup> T cells provided the protection against PPRV infection.  
68 We additionally identified class I restricted immunogenic epitopes of PPRV in  
69 C57BL/6 mice. Our study therefore paves the way for an optimal utilization of this  
70 model to unravel PPRV pathogenesis and assessing the host correlates of protection.

## 71 **Introduction**

72 Peste des petits ruminants virus (PPRV) causes high mortality in herds of  
73 small ruminants such as sheep and goats and is responsible for major economic  
74 losses to livestock sector in developing countries (1–4). PPRV is a negative sense,  
75 single stranded enveloped virus of paramyxoviridae family that also include other  
76 members that cause debilitating diseases in animals as well as humans. These  
77 include Rinderpest virus (RPV) and Canine distemper virus (CDV) of animals and  
78 measles virus (MeV) and mumps virus (MuV) of humans (5, 6). PPRV genomes  
79 encode for six structural proteins i.e., nucleocapsid (N), phosphoprotein (P), matrix  
80 (M), fusion (F), hemagglutinin (H) and polymerase (L) and two nonstructural proteins,  
81 C and V (5). The protective and pathological mechanisms activated by the virus as  
82 well as the roles of immune cells in its pathogenesis have not yet been adequately  
83 elucidated that is primarily attributed to the unavailability of a laboratory animal  
84 model. We therefore investigated PPRV pathogenesis in a more accessible vertebrate  
85 laboratory animal model to better understand immunity and immunopathology  
86 induced by PPRV.

87 Currently, a live attenuated prophylactic vaccine against PPRV is used in small  
88 ruminants. While the vaccine induces a lasting immunity, a transient  
89 immunosuppression is usually evident in vaccinated animals that could enhance their  
90 susceptibility to heterologous infections (3, 5). Therefore, it is imperative to study the  
91 contribution of cellular and molecular mediators induced by the virus in infected  
92 animals to better understand its pathogenesis and help devise improved vaccination  
93 strategies should a need arise. This is even more relevant for the contemporary animal  
94 health care system as the extensive efforts are made to eradicate PPRV globally. That  
95 an intensive vaccination program could help eradicate PPRV is bolstered by the

96 success achieved in eradicating a related RPV. Therefore, an accessible laboratory  
97 animal model for elucidating PPRV pathogenesis is likely to improve our  
98 understanding of the induced molecular and cellular mediators. Similarly such a model  
99 would shed light on the host correlates of protection.

100         We demonstrate a rapid induction of type I IFNs ( $\alpha$  and  $\beta$ ) as well as IFN- $\gamma$   
101 response in PPRV-stimulated immune cells but the kinetics of response varied  
102 depending on the cell types and the dose of the stimulating virus. Mice genetically  
103 deficient for IFN response (AG129) succumbed to the infection within ten days  
104 irrespective of the dose of inoculum or the route of PPRV infection. The inoculum  
105 size altered the pathology qualitatively. A lower infecting dose of the virus induced  
106 predominantly an immunopathological response in mice infected with PPRV via  
107 intranasal route. The replicating PPRV as well as its antigens were detected in most  
108 of the analyzed organs. Innate immune cells such as neutrophils and macrophages  
109 likely transported the replicating virus to CNS and elsewhere. A reconstitution of  
110 IFNR KO mice with wild type CD8<sup>+</sup> T cells conferred a survival advantage during  
111 infection, a suggestion for their critical role in the PPRV control. We also identified  
112 immunogenic class I (H-2K<sup>b</sup>) restricted epitopes of PPRV in mice using epitope  
113 prediction tools and demonstrated their immunogenicity *ex vivo* and *in vivo*.  
114 Therefore, our study established a laboratory animal model that could be valuable for  
115 understanding the immunological and virological parameters of morbilivirus induced  
116 diseases.

117

## 118 **Materials and Methods**

### 119 **Virus and cells**

120 PPRV vaccine strain Sungri/96 was used for all the *ex vivo* and *in vivo*  
121 experiments. The virus was cultured, harvested and titrated using Vero cells and  
122 stored at -80°C till further use as described earlier (4, 7). The infecting dose of the  
123 virus was calculated as TCID<sub>50</sub> values by a previously described method (8).  
124 RAW264.7 cells were cultured in complete RPMI medium supplemented with 10%  
125 FBS and penicillin-streptomycin in a humidified CO<sub>2</sub> incubator.

### 126 **Antibodies and other biological reagents**

127 Antibodies used in this study were purchased from BD Biosciences, Tonbo  
128 biosciences, BioLegend, and eBiosciences. The antibodies used were against CD4  
129 (clone GK1.5), purified CD16/32 (Clone 2.4G2), CD11b (clone M1/70), Gr1 (clone  
130 RB6-8C5), F4/80 (clone T45-2342), CD8 (clone 53-6.7), H2K<sup>b</sup> (clone AF6 88.5),  
131 mouse IgG, CD45.1 (clone A20), CD45.2 (clone 104), CXCR3 (clone 173), CD44  
132 (clone IM7), CD62L (clone MEL 14) and CD45 (Clone 30-F11). All the antibodies  
133 were diluted in FACS buffer. Other reagents such as DMEM, RPMI 1640, and  
134 penicillin-streptomycin antibiotic were purchased from Lonza. Trypsin, SYBR Green  
135 and propidium iodide were obtained from Life Technologies. H&E was from HiPrep,  
136 M-CSF was from Peprotech and OCT compound was obtained from Fisher  
137 HealthCare. FBS, p-nitrophenol phosphate and Freund's complete and incomplete  
138 adjuvant were procured from Sigma-Aldrich.

### 139 **Generation of bone marrow derived macrophages (BMDMs)**

140 Long bones were collected from sacrificed C57BL/6 mice and sterilized in  
141 70% alcohol. Bone marrows were removed to prepare single cell suspension as  
142 described earlier (9). RBCs present in the bone marrow cells were lysed and the bone

143 marrow cells were cultured in 48 well plates ( $1 \times 10^6$  cells/well) in the presence of  
144 10ng/ml M-CSF for 7 days. Media was changed after every two days. The cells were  
145 cultured in 10% RPMI (Gibco  $\square$  BRL, Rockville, MD, USA) supplemented penicillin  
146 (100U/mL) and streptomycin (100 $\mu$ g/mL). After 7 days, cells were collected, washed  
147 and stained for F4/80 positive and CD11c negative population for phenotypic  
148 characterization and for performing further experiments.

#### 149 **Measuring type I and II IFN response in PPRV pulsed macrophage cell line and** 150 **primary BMDM cells**

151 RAW macrophages and BMDMs were pulsed with PPRV at multiplicity of  
152 infection (MOI) of 1 and 10 to measure the kinetics of type I IFNs ( $\alpha$  and  $\beta$ ) and  
153 IFN- $\gamma$  response by qualitative real time polymerase chain reaction (RT-PCR). Murine  
154 macrophages and RAW cells pulsed with replicating PPRV or the inactivated virus  
155 and samples were collected at 15 min, 30 min, 1hr and 6hr. The cells were processed  
156 for isolating mRNA at different time points. The mRNA was converted into cDNA  
157 using a first strand synthesis kit (Verso cDNA synthesis kit, Thermo Fisher  
158 Scientific). The expression of hypoxanthine phosphoribosyltransferase 1 (HPRT 1)  
159 gene served as an internal control. The relative expression for each gene was  
160 calculated by using  $\Delta(\Delta C_t)$  method.

#### 161 **Infection of mice with PPRV**

162 All the experiments involving animal experiments were performed strictly in  
163 accordance with the protocol approved by the Institutional Animal Ethics  
164 Committee, IISER Mohali, constituted under the aegis of committee for the purpose  
165 of control and supervision of experiments on animals (CPCSEA). IFNR KO  
166 (AG129) and congenic C57BL/6 mice (CD45.1 and CD45.2) were used for *in vivo*  
167 experiments. Animals were infected using intraperitoneal (i.p) or intranasal (i.n)

168 routes with the indicated doses of PPRV. Different physiological parameters such as  
169 body weight, body temperature, behavior and the mortality pattern were measured in  
170 different groups of animals. For most of the experiments, the animals were sacrificed  
171 at the termination of experiments when the body weight for any of the groups  
172 dropped by more than 20%. Different lymphoid and non-lymphoid organs were  
173 collected to detect the replicating virus, viral antigens, and performing the cellular  
174 analysis in lymphoid organs such as spleen, mediastinal LNs as well as non-  
175 lymphoid organs such as bronchoalveolar lavage (BAL), lungs and brain tissues.  
176 Before collecting organs from different groups of mice, a heart perfusion with 20 ml  
177 of PBS was performed to remove any contaminating cells of blood from the collected  
178 organs.

### 179 **Reconstitution of IFNR KO mice with T cells to measure their anti-PPRV** 180 **functions**

181 In order to measure the protective ability of immune cells, the graded doses  
182 of MACS purified CD4<sup>+</sup> and CD8<sup>+</sup> T cells from C57BL/6 WT mice were adoptively  
183 transferred in sex matched IFNR KO animals. The recipient animals were  
184 subsequently infected with PPRV. Mice not transferred with any cells served as the  
185 control. Recipient animals were observed for their body weight and survival. At the  
186 termination of experiments, lymphoid organs of animals were collected for cellular  
187 analysis.

### 188 **Cell purification and adoptive transfer**

189 The different subsets of T cells and innate immune cells such as  
190 macrophages, neutrophils, dendritic cells were isolated from C57BL/6 mice either by  
191 magnetic cell sorting kits or by FACS sorting. The sorted cells were collected at low  
192 temperature in the complete RPMI. The cells were pulsed with PPRV for one hour.



193 After extensive washings, the cells were counted and the indicated numbers of cells  
194 were transferred i.v in IFNR KO mice.

### 195 **Bioinformatic analysis to predict immunogenic peptides of PPRV**

196 Amino acid sequences of PPRV structural proteins were retrieved from  
197 National Centre for Biotechnology Information (NCBI) database in FASTA Formats.  
198 The immunogenic peptides for one of the class I MHC molecules of C57BL/6 mice  
199 (H-2K<sup>b</sup>), were predicted using immune epitope data and analysis resource (IEDB).  
200 The software uses artificial network (ANN) and stabilized matrix method (SMM).  
201 The percentile rank of <2 and IC<sub>50</sub> values were selected for the prediction. A low  
202 percentile rank and the lower IC<sub>50</sub> values of <50nM indicated high affinity binders.  
203 The peptides with IC<sub>50</sub> values between 50 and <500nM were considered as  
204 intermediate affinity binders while with values >500nM were considered as the low  
205 affinity binders (10). Additional parameter for selecting peptides was their  
206 immunogenicity scores (11,12). Additionally a percentile rank for the predicted  
207 peptides was generated by comparing IC<sub>50</sub> values of predicted epitopes against a set  
208 of random peptides using SWISSPROT database. The selected peptides were  
209 commercially synthesized and obtained from GL Biochem. The purity of the synthetic  
210 peptides was greater than 90%.

### 211 **Molecular Docking analysis**

212 For predicting the binding affinities of different peptides for class I MHC  
213 molecules (H-2K<sup>b</sup> and Caprine Leucocyte antigen, CLA1), molecular docking  
214 analyses were performed using HPEPDOCK-web server. Default parameters were  
215 used for all the docking experiments as described elsewhere (13). HPEPDOCK  
216 server uses a hierarchical algorithm, MODPEP program for a blind protein-peptide  
217 docking and generates an ensemble of peptide conformation by considering

218 flexibility conformation in the respective peptide and the PDB File 1S7Q for the  
219 homology modeling with H-2K<sup>b</sup> protein. To test the efficiency of docking algorithm,  
220 a known immunogenic 9-mer peptide derived from Sendai E virus (SEV)  
221 nucleoprotein (FAPGNYPAL) was used for docking with H-2K<sup>b</sup>. Since the outcome  
222 of docking could be dictated by a potentially problematic algorithm that  
223 overemphasize the numbers of interactions rather than the conformation, we referred  
224 to the solved crystal structure of a nonameric peptide (SEV-9) with H-2K<sup>b</sup> to better  
225 predict the results from docking analyses. We then compared the energy parameters  
226 of the best-selected structures among different PPRV peptides docked with H-2K<sup>b</sup>.  
227 To further refine and define the interacting residues both quantitatively and  
228 qualitatively, we used molecular modeling program UCSF Chimera for binding  
229 analysis (14). As the goal of such experiments was to explore the translational value  
230 of such peptides in small ruminants, we superimposed H-2K<sup>b</sup> with goat class I MHC  
231 (CLA-1) molecule at 1.5A RMSD (root mean square distance) using the tool,  
232 Matchmaker, available in the UCSF Chimera. Similarly docking studies were done  
233 for CLA-I with different PPRV peptides and the representative docked structures  
234 were generated using UCSF Chimera. A comparative analysis between docking  
235 scores of H-2K<sup>b</sup> and CLA-I for the similar peptides was also performed.

### 236 **Class I MHC stabilization assays**

237         The stabilization of class I MHC by each peptide was measured using both  
238 cellular and acellular assays. TAP deficient murine T cell lymphoma cells (RMA/s  
239 cells) were used for determining the peptide induced surface stabilization of class I  
240 MHC molecule by flow cytometric analysis as described earlier (15). RMA/s cells  
241 were maintained in RPMI (Gibco□BRL, Rockville, MD, USA) supplemented with  
242 10% fetal bovine serum (FBS), penicillin (100U/mL) and streptomycin (100μg/mL).

243  $2 \times 10^5$  cells were serum starved for 3 hrs at 37°C and subsequently pulsed with the  
244 respective peptides to induce their surface class I MHC (H-2K<sup>b</sup>) stabilization. Graded  
245 doses of peptides were added in serum free RPMI followed in which cells were  
246 incubated at 37°C for 7 hrs. The cells were then washed with PBS and stained with  
247 anti anti-H-2K<sup>b</sup>-FITC antibody. Live and dead cells were differentiated using  
248 propidium iodide (PI) staining. The cells were analysed by FACS Accuri flow  
249 cytometer (BD Biosciences, Breda, The Netherlands). The data is represented as  
250 percent positive cells or the mean fluorescence intensities (MFI) for the expression of  
251 H-2K<sup>b</sup>. EC<sub>50</sub> value for high affinity peptides were then calculated.

252 An acellular assay was also used for determining the class I MHC  
253 stabilization as described elsewhere (16). Briefly, ELISA plates were coated with  
254 streptavidin overnight at 4°C. Subsequently, H-2K<sup>b</sup> monomers were added to the  
255 plates. The monomers were generated by refolding a UV photocleavable ligand,  
256 (FAPG(Anp)YPAL), β2 microglobulin and H-2K<sup>b</sup> heavy chain followed by their  
257 biotinylation as described earlier (15, 17). The unbound H-2K<sup>b</sup> monomers were  
258 washed and the control and PPRV peptides were added to the identified wells in the  
259 plates. The plates were then exposed to UV radiations at 365nm for 30 min to  
260 achieve the displacement of UV ligand with respective peptides. The efficiency of  
261 exchange was measured by probing the washed plates by adding anti-β2  
262 microglobulin antibody. Subsequently, a mouse anti-IgG antibody enzyme conjugate  
263 (1:10000) was added after washing the plates. Thereafter, substrate, (p-nitrophenol  
264 phosphate (1mg/ml) was added for its conversion into a chromogenic product. The  
265 stop solution was used to block the reaction and the plates were measured for  
266 absorbance at 405 nm. Positive and negative controls were also included in the study  
267 (18).

268 **PPRV infection and peptide immunization of mice for PPRV specific CD8<sup>+</sup> T**  
269 **cell analysis**

270 In order to determine the immunogenicity of predicted peptides in vivo, we  
271 performed two types of experiments. Throughout the manuscript, plaque forming  
272 units (PFU) and focal forming units (FFU) are used interchangeably as clear plaques  
273 are not observed when PPRV is grown in Vero cells. In first set of experiments, WT  
274 C57BL/6 mice were i.p. infected with a high dose of PPRV ( $5 \times 10^6$  PFU). After seven  
275 days a second dose of PPRV was given to animals to boost responses. The analysis  
276 of the expanded cells was performed three days later by measuring the frequencies  
277 PPRV-peptide specific CD8<sup>+</sup> T cells by tetramer staining. In second set of  
278 experiments, C57BL/6 mice were immunized either with the cocktail of peptide  
279 (AILTFLFLL, FMYLFLLGV, FSAGAYPLL and IGLVRDFGL) each with  
280 5µg/mouse in complete Freund's adjuvant subcutaneously. After two weeks, a  
281 second injection of the same concentration was administered but emulsified in the  
282 incomplete Freund's adjuvant. Three days later the frequencies of peptide specific  
283 CD8<sup>+</sup> T cells were analyzed by tetramer staining of PBMCs.

284 **Isolation of inflammatory cells from brain tissues and lungs**

285 Inflammatory cells were isolated from the brains and lungs of IFNR KO mice  
286 by using protocol as described earlier (19). Briefly, brain tissues were minced into 3-  
287 4 mm pieces with a sterile scalpel or scissors under complete aseptic conditions.  
288 Washing was done 4-5 times with 10mM PBS. Extra supernatant was removed from  
289 tissue pieces container kept on ice. 0.25% trypsin was added to samples followed by  
290 their incubation at 4°C for 16 hrs. Then, trypsin was discarded and incubation was  
291 done at 37°C for 30 min. Complete RPMI was added to prepare single cell  
292 suspension. After washing with PBS, cells were used further for experiments.

293 **Flow cytometry for cellular analysis**

294 Different lymphoid and non-lymphoid organs were collected from infected or  
295 immunized mice. The single cell suspensions were prepared from collected organs  
296 for cellular analysis. The cells were stained using indicated fluorescent labeled  
297 antibodies at cold temperature for 30 minutes. Fc block was done before surface  
298 staining. Stained cells were acquired by FACS Accuri or BD FACS Aria fusion. The  
299 analysis of the data was performed by Flow Jo software.

300 **Fluorescent microscopy and histological analysis**

301 The organs collected from infected and control animals were stored in OCT  
302 compound. Tissue sections of 6  $\mu$ m were cut and dried. The dried sections were first  
303 blocked with anti-CD16/CD32 antibodies followed by incubation with anti-PPRV H  
304 and N monoclonal antibodies. Anti mouse FITC IgG antibodies were then used as  
305 secondary antibodies. The sections were analyzed using a fluorescent microscope  
306 and the images were generated by Image J software. Similarly, the tissue section  
307 from brain tissues were dried and stained with Hematoxylin and Eosin Y. The  
308 sections were analyzed by Leica DMI8 microscope as described earlier (20).

309 **Statistical analysis**

310 Statistics was applied to the data and analysed by using ANOVA, Student t  
311 test or the Gehan-Breslow-Wilcoxon test as indicated in the respective figures. Graph  
312 Pad Prism v5.03 was used for such analysis. The level of significance was  
313 determined as  $P < 0.05$  \*,  $P < 0.01$  \*\*,  $P < 0.001$  \*\*\*,  $P < 0.0001$  \*\*\*\*.

314

315

## 316 **Results**

### 317 **PPRV infection induces a rapid interferon response**

318 Interferon response constitutes the first line of an anti-viral defense  
319 mechanism. We therefore measured the expression of both type I ( $\alpha$ ,  $\beta$ ) and type II  
320 ( $\gamma$ ) IFN response in a murine macrophage cell line (RAW macrophages) and the  
321 primary BMDMs that were stimulated with a low (1MOI) and high (10MOI) dose of  
322 PPRV. A low dose of PPRV as compared to the high dose induced significantly more  
323 IFN $\alpha$  in RAW macrophages at 1hr post stimulation (Fig 1A). However, a reverse  
324 trend as well as an early induction was observed in BMDMs (Fig 1D). Furthermore,  
325 the overall expression levels of IFN $\alpha$  were approximately 100 fold more in the  
326 primary BMDMs as compared to those in RAW macrophages (Fig 1A and D).  
327 Interestingly, we observed a very rapid induction of IFN $\alpha$  within 15 min of  
328 stimulation by primary BMDMs but its expression was evident in RAW  
329 macrophages only after 1 hour (Fig 1A and D). Similarly IFN $\beta$  expression was only  
330 detectable at significant levels in PPRV stimulated RAW macrophages after 1hour  
331 (Fig 1B). In stimulated BMDMs, the message of IFN $\beta$  was evident albeit at lower  
332 levels as compared to that of IFN $\alpha$  (Fig 1E). IFN $\gamma$  was induced at a low infecting  
333 dose of PPRV in RAW cells but the primary BMDMs expressed it in significant  
334 levels only at the high MOI of PPRV (Fig 1C and F). The heat inactivated PPRV  
335 induced the production of both type I and type II IFNs but to a much lesser extent  
336 and that too in the early stages of stimulation (Fig S1). These results might suggest  
337 that not only the viral genome or its replication intermediates but also some of the  
338 PPRV proteins could serve as the PAMPs for inducing IFN responses.

339 Our results demonstrated that both  $\alpha$  and  $\beta$  IFNs were induced in PPRV  
340 stimulated cells but the overall expression was dependent on the infecting dose as  
341 well as the nature of responding cells. The expression profile of type I interferon  
342 (IFN $\alpha$  and IFN $\beta$ ) also indicated a dichotomy in their function with the IFN $\alpha$  being  
343 induced rapidly and in high concentrations but IFN $\beta$  was produced later on. Such a  
344 response pattern could diversify the IFN response in providing an antiviral state.

#### 345 **Mice genetically depleted of IFNRs are susceptible to PPRV infection**

346 Having demonstrated a rapid induction of IFN response in the PPRV pulsed  
347 macrophages; we tested whether or not the mice, unable to mount IFN response  
348 because of genetic ablation of the signaling receptors, are susceptible to PPRV.  
349 Different doses of PPRV (1,  $10^2$ ,  $10^3$  and  $10^4$  PFU) were i.p inoculated into IFNR KO  
350 mice and the disease progression was monitored (Fig 2A). We first measured the  
351 survival of PPRV infected animals up to eight dpi. All the infected animals  
352 succumbed to the infection albeit survival duration was dependent on the initial  
353 inoculum (Fig 2B). Accordingly, animals infected with the high dose died earlier as  
354 compared to those infected with the lower dose of PPRV (Fig 2B). We then  
355 measured other physiological parameters and body weights in the infected animals  
356 (Fig 2C). All the infected animals gradually lost their body weights, developed  
357 encephalitic lesions and became hypothermic (Fig 2C and data not shown). By 7dpi,  
358 all the animals succumbed to the infection irrespective of the doses of virus inoculum  
359 used (Fig 2C). In similar experiments, PPRV infected WT mice remained refractory  
360 to the PPRV induced disease as no clinical signs were observed even in those  
361 infected with the high infecting dose ( $5 \times 10^6$  PFU) (Fig 2B and C, S6B). The results,  
362 therefore, underscored the critical role of IFN signaling in providing an early defense  
363 against PPRV infection in mice.

364 PPRV infected mice expressed encephalitic lesions. We, therefore, measured  
365 the presence of PPRV antigens in the brain tissue sections by fluorescent microscopy  
366 using anti-PPRV (H) monoclonal antibodies. We also measured the replicating virus  
367 particles in brain tissue homogenates by performing plaque-forming assays.  
368 Fluorescent microscopic images of brain tissue sections from the infected animals  
369 revealed an abundance of viral antigens particularly when the animals were infected  
370 with the high doses of the virus inoculum (Fig 2D). A dose dependent increase in the  
371 PPRV loads was recorded in the homogenized brain tissues (Fig 2E). Accordingly,  
372 the replicating virus titers were  $3.6 \pm 0.3$ ,  $5.0 \pm 0.4$  and  $6.4 \pm 0.3$   $\log_{10}/g$  of brain  
373 tissues at the infecting dose of 1,  $10^2$  and  $10^4$  PFU, respectively (Fig 2E). We also  
374 collected different organs such as lungs, livers, hearts, brains and kidneys of mice  
375 infected with 1 or  $1.5 \times 10^6$  PFU of PPRV to measure the virus loads as well as to  
376 detect the presence of viral antigens (Fig 2F-H). The fluorescent microscopic images  
377 showed the presence of PPRV antigens in the tissue sections of liver, lung and heart  
378 of infected animals given  $1.5 \times 10^6$  PFU (Fig 2F). The virus titers in liver, lung and  
379 heart were  $7.3 \pm 1.0$ ,  $5.2 \pm 0.5$  and  $4.9 \pm 0.08$   $\log_{10}$  PFU/g of tissue, respectively (Fig  
380 2G). The virus load in the animals infected with a low dose of 1 PFU of PPRV were  
381  $4.3 \pm 0.8$ ,  $5.8 \pm 0.8$ ,  $6.0 \pm 0.3$ ,  $6.1 \pm 0.2$  and  $5.7 \pm 0.8$  PFU  $\log_{10}/g$  of tissue in heart,  
382 lungs, liver, spleen and kidneys, respectively (Fig 2H). Our results therefore  
383 suggested an active replication of PPRV in different organs of mice deficient in IFNs  
384 signaling.

385 IFNR KO mice were susceptible to PPRV infection even at a very low  
386 inoculum size (1PFU); we therefore investigated whether or not the infecting dose  
387 qualitatively influenced the disease. The brain tissue sections from animals infected  
388 with varying doses of PPRV were stained with H&E and the single cell suspensions



389 from brain tissues were analyzed by flow cytometry (Fig 2I). A high dose of PPRV  
390 induced swelling of meninges in the infected brain tissues (Fig 2I, right panel).  
391 Interestingly, the stained sections of brain tissues from animals infected with low  
392 dose of PPRV (1PFU) showed greater leukocytic infiltration as compared to those  
393 infected with the high dose (Fig 2I, left panel). We also analyzed the phenotype of  
394 leukocytes from the single cell suspension of brain tissues by flow cytometry. The  
395 leukocytes (CD45<sup>+</sup> cells) were analyzed for neutrophils (CD11b<sup>+</sup>Gr1<sup>+</sup>) and  
396 macrophages (CD11b<sup>+</sup>F4/80<sup>+</sup>). Significantly higher frequencies of neutrophils were  
397 present in the brain samples of PPRV infected mice as compared to the uninfected  
398 controls (Fig 2J and K). The frequencies of macrophages also increased but the  
399 results were not statistically different in control and infected mice (Fig 2L and M).  
400 The increase in the frequencies of innate immune cells further supported the results  
401 that the infected mice developed encephalitic lesions.

402 Many members of genus morbillivirus are neurovirulent and the PPRV  
403 induced neurovirulence in naturally infected goat neonates was shown recently (21-  
404 23). Therefore, the infectivity of IFNR KO mice by PPRV, their observed  
405 neurovirulence as well as immune cells infiltration in infected tissues could suggest  
406 that these mice could represent a better accessible model for deciphering molecular  
407 and cellular mechanisms occurring during PPRV pathogenesis.

#### 408 **Innate immune cells are permissive to PPRV infectivity**

409 We established the infectivity of IFNR KO mice and showed the  
410 responsiveness of adaptive and innate immune cells. We then measured the immune  
411 response in spleens of PPRV infected IFNR KO mice (Fig 3). The frequencies of  
412 innate immune cells such as neutrophils (CD11b<sup>+</sup>Gr1<sup>+</sup>) increased by upto 10 fold in  
413 PPRV infected mice as compared to controls (Fig 3A and B). Other innate immune

414 cells such as macrophages (CD11b<sup>+</sup>F4/80<sup>+</sup>) and DCs (CD11b<sup>+</sup>CD11c<sup>+</sup>) also showed  
415 a significant increase in PPRV infected mice in comparison to control but to a lesser  
416 extent as compared to those of neutrophils (Fig 3F, G, K and L). A rapid induction of  
417 innate immune cells after PPRV infection and the expression of encephalitic lesions  
418 in infected IFNR KO mice even at a low dose of the virus led us to explore the  
419 possibility of virus transport to CNS by such cells. We, therefore, measured the  
420 infectivity of innate immune cells by PPRV using intracellular staining for the viral  
421 proteins. Neutrophils (Gr1<sup>+</sup>), macrophages (F4/80<sup>+</sup>), and DCs (CD11c<sup>+</sup>) from control  
422 and the infected animals were measured for the presence of PPRV hemagglutinin (H)  
423 and nucleocapsid (N) proteins using monoclonal antibodies (24). In morbilliviruses,  
424 N proteins are highly conserved and represent a major component of  
425 ribonucleoprotein complex while the H proteins help virus attach to the target cells.  
426 A significantly higher frequency of neutrophils isolated from PPRV infected mice  
427 showed the presence of H and N viral proteins (Fig 3C-E). Although PPRV proteins  
428 were also present in the macrophages and DCs of infected animals but the results  
429 were not statistically significant (Fig 3H-J and M-O). Therefore, neutrophils and  
430 perhaps other innate immune cells by virtue of their PPRV infectivity might  
431 contribute to the virus transport to different tissues.

#### 432 **Innate immune cells transport PPRV to central nervous system**

433 We investigated whether or not innate immune cells help transport PPRV to  
434 CNS. PPRV infected innate immune cells were adoptively transferred in congenic  
435 mice followed by monitoring the disease progression in recipients (Fig 4A).  
436 Neutrophils, macrophages and dendritic cells were FACS sorted from WT congenic  
437 mice (CD45.1<sup>+</sup>). The sorted cells were infected with PPRV and after extensive  
438 washings; these cells were transferred into sex matched IFNR KO mice (CD45.2<sup>+</sup>)

439 (Fig 4A). We recovered enhanced frequencies of neutrophils ( $CD45.1^+CD11b^+Gr1^+$ ,  
440  $\sim 4\%$ ) and macrophages ( $CD45.1^+CD11b^+F4/80^+$ ,  $\sim 2\%$ ) from brain tissues of  
441 recipients (Fig 4B and C). Moreover, the transferred PPRV-pulsed cells resulted in a  
442 patent infection in recipients with the progression of disease being similar to that  
443 observed in PPRV only injected animals (Fig 4D). This data suggested that infected  
444 innate immune cells particularly the neutrophils and macrophages could support virus  
445 replication and transport PPRV to different organs. We did not recover significantly  
446 higher frequencies of donor DCs ( $CD45.1^+CD11b^+CD11c^+$ ) in the brain tissues of  
447 recipient mice but the disease severity was comparable in all the recipients (Fig 4B-  
448 D). Several factors could explain these results such as the inability of transferred DCs  
449 to directly home to brain tissues or their inefficient proliferation. Nonetheless, such  
450 cells might have transferred the virus to other inflammatory cells, which then could  
451 have transported it to brain tissues and elsewhere. The observed increased leukocytic  
452 infiltration in the brain tissues supported this notion (data not shown). Further analysis  
453 of different innate immune cells pulsed with PPRV demonstrated their infectivity as  
454 PPRV antigens could be detected in such cells by flow cytometry (Fig 4E and F).  
455 These results indicated that the virus could either be internalized by innate immune  
456 cells or be associated to surfaces and such cells could transport PPRV to distant sites  
457 such as the CNS.

#### 458 **PPRV induces lung pathologies in IFNR KO animals infected with intranasal** 459 **route**

460 PPRV causes respiratory disease in infected small ruminants and the infection  
461 spreads among animals in the herd due to their closer association, we therefore  
462 investigated its pathogenesis in mice infected via intranasal route. IFNR KO animals  
463 were infected with varying doses of PPRV and were analyzed for their survival, body

464 weights and other physiological parameters (Fig 5). The survival analysis of animals  
465 showed a significant effect of inoculum sizes but all infected animals eventual  
466 outcome in all the animals remained same as was observed in the i.p. infected mice  
467 (Fig S2). Thus, animals infected with the lower dose ( $10^2$ PFU) succumbed to the  
468 infection later and those infected with the higher doses ( $10^6$ PFU) died within 6 days.  
469 For performing the cellular analysis at the tissue sites and lymphoid organs of  
470 animals, additional groups of infected animals were sacrificed when approximately  
471 20% of their body weights were lost (Fig 5A, S3-6). WT animals were infected with  
472 a high dose ( $10^6$  PFU/mouse) as all i.p infected animals with the higher inoculum  
473 size survived (Fig 2B-C, data not shown). Infected WT animals reduced their body  
474 weights transiently followed by their rapid recovery until the termination of the  
475 experiments while the infected IFNR KO animals gradually reduced their body  
476 weights at both the doses ( $10^4$  PFU and  $10^6$  PFU) of PPRV (Fig 5B). The animals  
477 were terminally anaesthetized at 6dpi for performing cellular analysis in collected  
478 BALs, lungs, brain and lymphoid organs. Approximately two fold higher infiltration  
479 level of leukocytes was observed in the BALs of WT animals as compared to the  
480 IFNR KO animals suggesting for the immune reactivity against PPRV (Fig 5C). We  
481 observed an enhanced infiltration of leukocytes in the BALs (~ 42% vs 30%) as well  
482 as lung tissues (27% vs 19%) of IFNR KO animals infected with the low ( $10^2$  PFU)  
483 and high ( $10^4$  PFU) dose of PPRV (Fig 5C and D). That the infiltrating leukocytes  
484 could be involved in protection against the virus was indicated by their inverse ratios  
485 observed in the lung tissues of two groups of PPRV infected animals (Fig 5C and D).  
486 This could suggest that an efficient viral control could be achieved before a patent  
487 lung infection is established and leukocytes are recruited. A minimal infiltration of  
488 leukocytes was evident in the brain tissues of IFNR KO and WT animals infected via

489 intranasal route and the observed frequencies were similar in both the groups of mice  
490 (Fig 5E). We then phenotypically characterized different immune cells among the  
491 leukocyte populations in different organs. The relative abundance of macrophages  
492 (CD11b<sup>+</sup>F4/80<sup>+</sup>), neutrophils (CD11b<sup>+</sup>Gr1<sup>+</sup>), NK cells (NK1.1<sup>+</sup> cells), helper (CD4<sup>+</sup>)  
493 and cytotoxic (CD8<sup>+</sup>) T cells was measured in the non-lymphoid as well as lymphoid  
494 organs of infected WT and IFNR KO mice (Fig 5F-Z). Upto a five fold reduction in  
495 the frequencies of macrophages and neutrophils were observed in the BALs, lung  
496 tissues, brain, mediastinal LNs and spleens of infected WT animals as compared to  
497 those in IFNR KO mice (Fig 5G, H, K, L, P, Q, R, W and X). The frequencies of NK  
498 cells were similar in BALs but decreased in the lung and spleen of the PPRV infected  
499 WT animals as compared to those in IFNR KO mice (Fig 5I, M and Y). The  
500 increased frequencies of both CD4<sup>+</sup> and CD8<sup>+</sup> T cells in BALs and lung tissues of  
501 PPRV infected WT mice in comparison to those of the IFNR KO mice were  
502 observed (Fig 5J and N). BALs and mediastinal LNs of infected IFNR KO animals  
503 injected with different doses strikingly had more frequencies of neutrophils at a  
504 lower dose as compared to those at high dose (Fig 5H and R). Such a trend was not  
505 observed in lung tissues, brain and spleen samples of the infected animals (Fig 5L, P  
506 and X). The inverse correlation with PPRV inoculum size and the recruitment of  
507 macrophages was not observed in lungs, brain and spleens of IFNR KO animals  
508 infected (Fig 5G, K O and W). Enhanced frequencies of NK cells but a reduction in  
509 the frequencies of neutrophils and macrophages were observed for both BAL and  
510 lung tissues of WT mice (Fig 5G – I and K-M). Similarly, the frequencies of both  
511 CD4<sup>+</sup> and CD8<sup>+</sup> T cells increased in the spleens, BALs and lung tissues of PPRV  
512 infected WT mice that efficiently controlled PPRV infection (Fig 5F, J and N). These  
513 results suggested for the anti-PPRV activity of NK cells and T cells.

514 We further explored whether or not PPRV infection induces the activation of  
515 T cells. A significant proportion of CD4<sup>+</sup> T cells displayed an activation profile  
516 (CD62L<sup>lo</sup>CXCR3<sup>+</sup>) in WT animals but the frequencies of such cells were up to three  
517 fold higher in the IFNR KO animals (Fig 5S and T, S5). However, the frequencies of  
518 activated CD62L<sup>lo</sup>CXCR3<sup>+</sup> CD8<sup>+</sup> T cells was ~2 fold lower in WT animals as  
519 compared to those in IFN RKO mice (Fig 5U and V, S5). Innate immune cells such  
520 as the NK cells in WT animals could help achieve an efficient viral control but such  
521 mechanisms might require the activity of IFNs as abundant replicating viral particles  
522 were present in the IFNR KO animals. Furthermore, the antigen presenting cells  
523 stimulated both CD4<sup>+</sup> and CD8<sup>+</sup> T cells but such cells were compromised in their  
524 function owing to their lack of type I IFN responsiveness.

525 Taken together, the analysis of cellular infiltration suggested for the role of  
526 neutrophils in promoting PPRV pathogenesis while NK cells and T cells playing  
527 protective roles.

#### 528 **IFN responsive CD8<sup>+</sup> T cells delay mortality in PPRV infected IFNR KO mice**

529 We established the susceptibility of IFNR KO mice to PPRV, the potential  
530 spread of PPRV by infected innate immune cells and expansion of innate immune  
531 cells as well as T cells in PPRV infected WT mice that controlled the virus well (Fig  
532 S6B). We then explored whether WT T cells could either protect infected IFNR KO  
533 animals or reduce the severity of PPRV infection. FACS sorted CD4<sup>+</sup> and CD8<sup>+</sup> T  
534 cells from WT mice were transferred into IFNR KO animals. Such cells were allowed  
535 to expand for 40 days in recipients, which were then infected with PPRV (Fig S7A).  
536 In comparison to infected controls that gradually lost their body weight, CD8<sup>+</sup> T cell  
537 recipients showed a significantly reduced body weights until their termination at 6dpi  
538 (Fig S7B). WT CD4<sup>+</sup> T cell recipient mice and those received bone marrow cells did

539 not shown alteration in the rates or the kinetics of body weight loss (Fig S7B, data not  
540 shown). The activation status of CD8<sup>+</sup> and CD4<sup>+</sup> T cells of control and T cell recipient  
541 mice revealed more frequencies of CD4<sup>+</sup> and CD8<sup>+</sup> T cells expressing high levels of  
542 CD44 when WT CD8<sup>+</sup> T cells were transferred (Fig S7C-F, data not shown). These  
543 results suggest anti-viral activity of WT CD8<sup>+</sup> T cells.

544 We then measured whether or not previously PPRV-primed WT CD8<sup>+</sup> T cells  
545 confer protection to the PPRV infected IFNR KO mice. 5x10<sup>6</sup> of FACS sorted WT  
546 CD8<sup>+</sup> T cells from naïve or the mice previously infected with PPRV were transferred  
547 before infecting IFNR KO mice with PPRV (Fig 6A). The survival analysis showed a  
548 significant advantage conferred to the infected IFNR KO mice by transferred naïve or  
549 primed CD8<sup>+</sup> T cells in delaying mortality (Fig 6B). Such effects occurred in a dose  
550 dependent manner with animals receiving five fold lower CD8<sup>+</sup> T cells succumbed to  
551 the infection early (Fig S7 and data not shown). Separate groups of PPRV infected  
552 CD8<sup>+</sup> T cell recipients were measured for a change in their body weights and cellular  
553 analysis on 7dpi (Fig S8 and S9). CD8<sup>+</sup> T cell recipients showed significantly reduced  
554 body weights by 6dpi (Fig 6C). Cellular analysis showed that approximately 50% of  
555 CD45<sup>+</sup> cells were present in the BAL of PPRV infected animals and the frequencies  
556 decreased to 30% in CD8<sup>+</sup> T cells recipients (Fig 6D). Similarly in the lung tissues of  
557 infected animals the frequencies of CD45<sup>+</sup> cells reduced from 25% to 15% in CD8<sup>+</sup> T  
558 cells recipients (Fig 6E). However, such effects were prominently observed in the  
559 group receiving CD8<sup>+</sup> T cells from previously PPRV-infected animals. Neutrophils  
560 levels increased in the BALs of CD8<sup>+</sup> T cell recipients IFNR KO mice by ~1.5 fold  
561 but the macrophages and NK cells decreased by ~ 10% (Fig 6F(a)-F(c)). In the lungs  
562 tissues, no significant differences in the cellular infiltrations were observed but for an  
563 increase in macrophages in CD8<sup>+</sup> T cell recipients (Fig 6G). The cellular analysis in

564 the MLN and spleen samples of infected animals revealed a reduction in the  
565 frequencies of innate immune cells such as neutrophils and macrophages but more  
566 CD4<sup>+</sup> and CD8<sup>+</sup> T cells were observed in WT CD8<sup>+</sup> T cell recipient mice (Fig 6J and  
567 H). Phenotypic characterization of CD4<sup>+</sup> and CD8<sup>+</sup> T cells in control and WT CD8<sup>+</sup> T  
568 cell recipient PPRV infected IFNR KO mice showed a reduced expression of the  
569 activation molecule CXCR3 and as well as a lymph node retention molecule CD62L  
570 (Fig 6I). However in the spleen of WT CD8<sup>+</sup> T cell recipient mice the expression of  
571 CXCR3 was increased but that of CD62L reduced by both CD4<sup>+</sup> and CD8<sup>+</sup> T cells  
572 (Fig 6K). These results might mean suggest for the retention of CD8<sup>+</sup> T cells in the  
573 LNs of infected animals probably due to more chemokines build up and a less  
574 efficient gradient generation for such chemokines to facilitate their exit and viral  
575 control at the infection sites (25). A detailed analysis is currently underway.

576 We observed an aberrant activation profile of T cells in PPRV infected mice,  
577 but a crucial role of functionally competent CD8<sup>+</sup> T cells was evident in mitigating  
578 PPRV pathogenesis.

#### 579 **Identification of immunogenic CD8<sup>+</sup> T cell epitopes of PPRV *in silico***

580 We identified immunogenic epitopes of PPRV that could induce specific  
581 CD8<sup>+</sup> T cells response in mice. All the structural proteins (hemagglutinin, matrix,  
582 nucleocapsid and fusion proteins) of PPRV were analyzed for predicting H-2K<sup>b</sup>  
583 restricted epitopes using IEDB database. We focused our analysis on the structural  
584 proteins because such proteins are critical for the viral assembly and its envelope  
585 formation (24). Peptides with low percentile ranks and the IC<sub>50</sub> value of <200nM  
586 were selected (Table S1). Out of the list generated, top 12 best ranking peptides (three  
587 from each protein) were chosen for synthesis and further analysis (Fig 7A). The  
588 peptides included in analysis were IVVRRTAGV, VAFNILVTL, FMYLFLLGV



589 (matrix protein), FSAGAYPLL, ASFILTIKF, SSITTRSRL (Nucleocapsid protein),  
590 VILDRERLV, IEHIFESPL, IGLVRDFGL (hemagglutinin protein) and  
591 (AILTFLFLL, VAILTFLFL, SGGDFLAIL (fusion protein). The peptides were  
592 subjected to *in silico* analysis. Molecular docking is one of the most frequently used  
593 methods to predict the conformation of small-molecule ligands. Docking of selected  
594 peptides from different proteins of PPRV against H-2K<sup>b</sup> was performed and the  
595 models were analyzed using Chimera tool. The energy parameters of the best fitting  
596 structures among PPRV peptides were determined (Table S2 and S3). The best  
597 docking results were provided by PPRV peptides FMYLFLLGV and FSAGAYPLL  
598 with H-2K<sup>b</sup>. FMYLFLLGV peptide even yielded better docking scores than the  
599 reference peptide FAPGNYPAL (SEV-9) of Sendai E virus (Fig 7B and D and Table  
600 S2). Further analyses revealed phenylalanine residues at position 1 and 5 in  
601 FMYLFLLGV peptide as the probable anchors. Similarly, for FSAGAYPLL peptide  
602 phenylalanine at position 1 and proline at position 7 were predicted to be the most  
603 probable anchors. Docking of peptides was also performed with class MHC molecule  
604 of goat (CLA1) (Fig 7C and F, S10 and Table S3). CLA-I and H-2K<sup>b</sup> superposed near  
605 perfectly at an RMSD value of 1.5A (Fig 7E). The predicted peptides showed a  
606 similar trend of docking with CLA-1 molecule. The anchor residues as well as the  
607 docking scores of FMYLFLLGV and FSAGAYPLL peptides scored better in these  
608 analyses (Fig 7E-F). Interestingly, all the epitopes displayed better docking with  
609 CLA-1 than with H-2K<sup>b</sup> indicating their immunogenicity in generating anti-viral  
610 response against PPRV infection in the natural host, goats (Fig 7F). A total of 12  
611 peptides were predicted that could potentially be immunogenic in mice as well as in  
612 the natural host of PPRV goats.

613 **Assessing class I MHC stabilization potential of predicted PPRV epitopes using**  
614 **acellular and cellular assays**

615 We tested all top performing peptides for their class I MHC stabilization  
616 potential using acellular and cellular assays. SIINFEKL, an Ova derived peptide with  
617 known immunogenicity for H-2K<sup>b</sup>, was used as a positive control. In order to  
618 measure the MHC stabilizing potential of predicted epitopes, we performed ELISA.  
619 The heterotrimeric complex consisting of a photocleavable ligand,  $\beta$ 2 microglobulin  
620 and H-2K<sup>b</sup> was immobilized to solid phase by plate-coated streptavidin. UV displaced  
621 conditional ligand and its replacement with the testing peptide yields a positive  
622 reaction that can be detected by anti- $\beta$ 2 microglobulin antibody (16). Fold change  
623 values as compared to those obtained for SIINFEKL peptide for each of the PPRV  
624 derivative peptides are shown in Fig 8A. Accordingly, FSAGAYPLL, IGLVRDFGL,  
625 AILTFLFLL, SSITTRSRL, IVVRRTAGV, IEHIFESPL, VAFNILVTL, and  
626 VILDRERLV displayed higher values as compared to other peptides (Fig 8A).

627 The peptides were also analysed for their class I MHC stabilizing activities  
628 using transporter associated with antigen processing and presentation (TAP) deficient  
629 RMA/S cells. Such cells express fewer molecules of class I MHCs on surface but the  
630 exogenously added immunogenic peptides help stabilize their expression (26).  
631 Different concentrations PPRV peptides were added to serum starved RMA/S cells  
632 (Fig 8B-D). Out of 12 peptides, four peptides FMYLFLLGV (matrix protein),  
633 FSAGAYPLL (nucleocapsid protein), IGLVRDFGL (hemagglutinin protein) and  
634 AILTFLFLL (fusion protein) showed higher affinity for H-2K<sup>b</sup> molecule and induced  
635 more cells to express H-2K<sup>b</sup> (Fig 8B-D). The results were dependent on the  
636 concentrations of the peptides used (Fig 8B-D). Similar results were obtained when  
637 the mean fluorescence intensity (MFI) values were measured for the expression of H-

638 2K<sup>b</sup> by each peptide (data not shown). Log EC<sub>50</sub> values for AILTFLFLL,  
639 FSAGAYPLL, IGLVRDFGL and FMYLFLLGV peptides were 2.098, 1.469, 1.228  
640 and 1.268 µg/ml, respectively (Fig 8D).

#### 641 **Immunogenicity of PPRV peptides in PPRV infected or immunized mice**

642 We measured response of CD8<sup>+</sup> T cells in PPRV infected and immunized  
643 mice. As C57BL/6 mice were refractory to PPRV infection, we used a high dose of  
644 PPRV (5x10<sup>6</sup> PFU) PPRV for infection. After 7 days, a boosting dose was given and  
645 the analysis was done in blood samples three days later by measuring the numbers  
646 and frequencies of class I MHC tetramer (H-2K<sup>b</sup>-p(PPRV)-tetramer). Our results  
647 showed significantly more numbers of antigen-specific CD8<sup>+</sup> T cells against  
648 AILTFLFLL, FSAGAYPLL and IGLVRDFGL peptides of PPRV as compared to  
649 those induced against FMYLFLLGV (Fig 9A-C). Tetramer positive CD8<sup>+</sup> T cell  
650 count was also high for FSAGAYPLL, IGLVRDFGL peptides in animals immunized  
651 with the cocktail of four peptides (Fig. 9D-E). The functionality of PPRV specific  
652 CD8<sup>+</sup> T is currently being investigated.

653 Our results suggest an induction of CD8<sup>+</sup> T cell response against predicted  
654 PPRV epitopes. Therefore, our results also suggest that immunization with peptides  
655 could represent a potential subunit vaccination approach for PPRV to investigate  
656 properties of CD8<sup>+</sup> T cells during PPRV infection in mice.

657

658

659 **Discussion**

660           With ramped up efforts to eradicate PPRV by intensive vaccination programs,  
661 it has become imperative to develop an accessible laboratory animal model to better  
662 understand its pathogenesis and more importantly the immune correlates of protection  
663 against the virus. Such investigation could enhance prospects of devising an  
664 alternative vaccine strategies should a need arise. We undertook this study to develop  
665 a laboratory mouse model to elucidate PPRV pathogenesis, the role of innate immune  
666 cells and cytotoxic T cells in its control. We demonstrated the susceptibility of IFNR  
667 KO mice to PPRV infection. The infected animals succumbed to PPRV infection  
668 irrespective of the dose of inoculum and route of infection. The replicating viruses as  
669 well as the derivative antigens were present abundantly in most of the critical organs  
670 of infected mice. Neutrophils and macrophages likely served as the Trojan horse to  
671 transport virus to the CNS to cause encephalitis while CD8<sup>+</sup> T cells in addition to NK  
672 cells were protective in PPRV infected mice. We also discovered immunogenic  
673 epitopes of PPRV and enumerated virus-specific CD8<sup>+</sup> T cells in infected and  
674 immunized mice C57BL/6 mice using an array of MHC tetramers. Our results showed  
675 the infectivity of adult mice that can serve as a laboratory animal model for  
676 investigating PPRV pathogenesis and further decipher protective role of CD8<sup>+</sup> T cells.

677           PPRV, a member of morbilivirus genus of paramyxoviridae family, incurs  
678 significant losses to animal husbandry sector in endemic areas (27). Therefore,  
679 intensive vaccination programs are being adopted in many countries to eradicate the  
680 virus. A laboratory mouse model would be useful not only to better understand the  
681 contribution of cellular and molecular mediators in the viral of pathogenesis but also  
682 to test the efficacy of anti-virals. One such class of host-derived molecules includes  
683 type I IFNs that have potent anti-viral effects. We observed distinct expression pattern

684 of type I IFNs induced by PPRV stimulated innate immune cells depending on the  
685 dose of infecting virus, and the intrinsic properties of responding cells (RAW  
686 macrophages versus bone marrow derived primary macrophages). These results could  
687 suggest for a diversification in the function of type I IFNs. Such a phenomenon is  
688 well documented for the activity of type I and type III IFNs that was shown to be  
689 largely attributed to the expression pattern of their cognate receptors (28). While the  
690 receptors for type I IFNs (IFNAR1 and IFNAR2) are ubiquitously present on most  
691 cells, type III IFNRs (IFNL complex) are predominantly present in epithelial cells and  
692 only a subset of innate immune cells such as neutrophils (27, 29). A dichotomy is also  
693 known with the activity of type I IFNs i.e., IFN $\alpha$  and IFN $\beta$ (30). Furthermore, a  
694 specific inhibition of IFN $\beta$  signaling by antibodies converted the course of a persistent  
695 viral infection with LCMV clone 13 into an infection that could be efficiently  
696 controlled in the acute phase (31). Therefore, further analysis to decipher the relative  
697 roles of different species of type I IFNs in the protection against PPRV would be  
698 valuable.

699 In WT animals the activity of NK cells might control PPRV infection  
700 sufficiently and CD4<sup>+</sup> and CD8<sup>+</sup> T cells playing a subsidiary antiviral role (Fig 5).  
701 We observed efficient infiltration of NK cells in the BAL and lung tissues but the  
702 animals eventually succumbed to the infection (Fig 5I and M). These results  
703 suggested a critical role of IFN signaling in the NK cells mediated control of PPRV  
704 and the killing activity of such cells alone might not suffice to achieve viral control.  
705 The expansion and the migration of T cells particularly of CD4<sup>+</sup> T cells in PPRV  
706 infected WT mice in comparisons to those in the IFNR KO mice could suggest for a  
707 critical role played by IFN signaling in the efficient activation or the migration of  
708 such cells which can then help efficient priming of CD8<sup>+</sup> T cells. That the CD4<sup>+</sup> T

709 cell responses precede CD8<sup>+</sup> T cells was shown earlier (32). Earlier reports also  
710 suggested that an inefficient JAK/STAT signaling in CD8<sup>+</sup> T cells that occur  
711 following type I IFN ligation with their cognate receptors enhances the propensity of  
712 such cells to undergo apoptosis by host factors such as the glucocorticoids. Multiple  
713 studies have shown that microbial infections can actively engage hypothalamic  
714 pituitary adrenal (HPA) axis to induce glucocorticoids able to induce the apoptosis of  
715 CD8<sup>+</sup> T cells (17). Whether or not PPRV infection predominantly activate HPA axis is  
716 not known currently. That CD8<sup>+</sup> T cells are involved in anti-PPRV defense  
717 mechanisms was shown by the adoptive transfer of WT CD8<sup>+</sup> T cells, isolated from  
718 previously infected mice that resolved the infection (Fig 6).

719         With limited data available for PPRV cell and tissue tropism, its replication  
720 was demonstrated in the lymphoid organs (6). The known receptor for PPRV are  
721 SLAM family proteins (33). Our results demonstrated that the cells of innate immune  
722 origin expanded upon PPRV infection in IFNR KO mice were susceptible to the viral  
723 infection. Surprisingly innate immune cells such as neutrophils and macrophages  
724 were potentially able to transfer virus to distal locations (Fig 3 and 4). The innate  
725 immune cells express SLAM receptors abundantly and therefore their susceptibility to  
726 PPRV infection could involve these receptors (33). The identification of a particular  
727 receptor in the susceptibility of mice has not been explored and constitutes part of our  
728 ongoing investigations. It would be interesting to explore whether PPRV replicates in  
729 the innate immune cells of sheep and goats. If indeed such cells exhibit susceptibility  
730 to PPRV, it might necessitate revisiting vaccination strategies to help achieve a  
731 complete viral eradication. Neurovirulence and neuropathology induced by PPRV are  
732 recently reported in goat kids and newly born BALB/c mice as well as CD1d  
733 knockout mice, the latter induce inefficient NK cells responses (22, 23). However the

734 susceptibility of IFNR KO mice to PPRV was not shown earlier. Our observations  
735 could be more relevant for some herds that might have mutations in one or more  
736 components of signaling pathways involving type I IFNs. Animals and humans with  
737 signaling defects in pathways leading to type I IFN production are exceedingly  
738 susceptible to viral infections (21, 34). We used a vaccine strain of PPRV that  
739 induced a hundred percent mortality in IFNR KO mice and no apparent disease in WT  
740 C57BL/6 mice. Whether or not the virulent strain of PPRV can induce the disease and  
741 potent CTL response in WT mice is currently being investigated in our laboratory.

742         An initial encounter of host with viruses elicit type I IFN response, but for a  
743 long term protection the optimal activity of CD8<sup>+</sup> T cells is crucial in virus clearance  
744 (17, 35). This necessitates identifying class I epitopes that can be used to quantify and  
745 assess functionality of such cells (11). Moreover, designing a vaccine against an  
746 intracellular pathogen also requires information about immunogenic epitopes that can  
747 also serve as subunit vaccine candidates. Screening of peptides of an antigen is best  
748 done by *in silico* analysis as invariably a large number of linear amino acid sequences  
749 need to be probed. The utility of class I MHC tetramers in staining antigen-specific  
750 CD8<sup>+</sup> T cells and discovering epitopes in a throughput manner is unmatched but has  
751 not been adequately put to use particularly for animal pathogens (18, 36). The  
752 prediction of peptide is necessary for diagnosis, formulating vaccines as well as for  
753 analyzing the functionality of cells (11, 18, 37). We discovered at least four  
754 immunogenic epitopes from structural proteins of PPRV using *in silico*, *ex vivo* and *in*  
755 *vivo* approaches. That the immunization of mice with a cocktail of peptides induced  
756 PPRV specific CD8<sup>+</sup> T cells constitute first such example for PPRV. Furthermore  
757 such an approach provides impetus to subunit vaccine development. Our ongoing

758 investigations would help decipher pathways in virus specific CD8<sup>+</sup> T cells that could  
759 help provide protection during acute as well as memory response.



760 **References**

- 761 1. Diallo A, Minet C, Le Goff C, Berhe G, Albina E, Libeau G, Barrett T. 2007.  
762 The threat of peste des petits ruminants: progress in vaccine development for  
763 disease control. *Vaccine* 25:5591–5597.
- 764 2. Singh RK, Balamurugan V, Bhanuprakash V, Sen A, Saravanan P, Yadav MP.  
765 2009. Possible control and eradication of peste des petits ruminants from India:  
766 technical aspects. *Vet Ital* 45:449–462.
- 767 3. Kumar P, Tripathi BN, Sharma AK, Kumar R, Sreenivasa BP, Singh RP, Dhar  
768 P, Bandyopadhyay SK. 2004. Pathological and immunohistochemical study of  
769 experimental peste des petits ruminants virus infection in goats. *J Vet Med Ser*  
770 *B* 51:153–159.
- 771 4. Mahapatra M, Parida S, Egziabher BG, Diallo A, Barrett T. 2003. Sequence  
772 analysis of the phosphoprotein gene of peste des petits ruminants (PPR) virus:  
773 editing of the gene transcript. *Virus Res* 96:85–98.
- 774 5. Baron MD, Parida S, Oura CAL. 2011. Peste des petits ruminants: a suitable  
775 candidate for eradication? *Vet Rec* 169:16–21.
- 776 6. Truong, T. Boshra, H. Embury-Hyatt, C. Nfon, C. Gerdts, V, Tikoo, S. Babiuk,  
777 LA. Kara, P. Chetty, T. Mather, A. Wallace, DB. Babiuk S. 2014. Peste des  
778 Petits Ruminants Virus Tissue Tropism and Pathogenesis in Sheep and Goats  
779 following Experimental Infection. *PLoS One* 9:e87145.
- 780 7. Berhe, G. Minet, C. Le Goff, C. Barrett, T. Ngangnou, A. Grillet, C. Libeau, G.  
781 Fleming, M. Black, DN. Diallo A. 2003. Development of a dual recombinant  
782 vaccine to protect small ruminants against peste-des-petits-ruminants virus and  
783 capripoxvirus infections. *J Virol* 77:1571–7.
- 784 8. Reed L, Muench H. 1938. A simple method of estimating fifty percent end

- 785 points. *Am J Epidemiol* 27:493–497.
- 786 9. Wang C, Yu X, Cao Q, Wang Y, Zheng G, Tan TK, Zhao H, Zhao Y, Wang Y,  
787 Harris DCH. 2013. Characterization of murine macrophages from bone  
788 marrow, spleen and peritoneum. *BMC Immunol* 14:6.
- 789 10. Moutaftsi M, Peters B, Pasquetto V, Tschärke DC, Sidney J, Bui H-H, Grey H,  
790 Sette A. 2006. A consensus epitope prediction approach identifies the breadth  
791 of murine TCD8<sup>+</sup>-cell responses to vaccinia virus. *Nat Biotechnol* 24:817–819.
- 792 11. Calis JJA, Maybeno M, Greenbaum JA, Weiskopf D, De Silva AD, Sette A,  
793 Keşmir C, Peters B. 2013. Properties of MHC class I presented peptides that  
794 enhance immunogenicity. *PLoS Comput Biol* 9.
- 795 12. Peters B, Bui H-H, Frankild S, Nielsen M, Lundegaard C, Kostem E, Basch D,  
796 Lamberth K, Harndahl M, Fleri W. 2006. A community resource  
797 benchmarking predictions of peptide binding to MHC-I molecules. *PLoS*  
798 *Comput Biol* 2.
- 799 13. Remmert M, Biegert A, Hauser A, Söding J. 2012. HHblits: lightning-fast  
800 iterative protein sequence searching by HMM-HMM alignment. *Nat Methods*  
801 9:173.
- 802 14. Pettersen EF, Goddard TD, Huang CC, Couch GS, Greenblatt DM, Meng EC,  
803 Ferrin TE. 2004. UCSF Chimera—a visualization system for exploratory  
804 research and analysis. *J Comput Chem* 25:1605–1612.
- 805 15. Sehrawat S, Kirak O, Koenig P-A, Isaacson MK, Marques S, Bozkurt G, Simas  
806 JP, Jaenisch R, Ploegh HL. 2012. CD8(+) T cells from mice transnuclear for a  
807 TCR that recognizes a single H-2K(b)-restricted MHV68 epitope derived from  
808 gB-ORF8 help control infection. *Cell Rep* 1:461–71.
- 809 16. Chew SL, Or MY, Chang CXL, Gehring AJ, Bertoletti A, Grotenbreg GM.

- 810 2011. Stability screening of arrays of major histocompatibility complexes on  
811 combinatorially encoded flow cytometry beads. *J Biol Chem* 286:28466–  
812 28475.
- 813 17. Kumar, D. Sehrawat S. 2019. Divergent Effects of a Transient Corticosteroid  
814 Therapy on Virus-Specific Quiescent and Effector CD8+ T Cells. *Front*  
815 *Immunol* 10:1521.
- 816 18. Rodenko B, Toebes M, Hadrup SR, Van Esch WJE, Molenaar AM,  
817 Schumacher TNM, Ovaa H. 2006. Generation of peptide–MHC class I  
818 complexes through UV-mediated ligand exchange. *Nat Protoc* 1:1120.
- 819 19. Freshney RI. 1987. *Culture of animal cells: a manual of basic technique*. New  
820 York: Alan R. Liss. Inc 1:177.
- 821 20. Kaur M, Kumar D, Butty V, Singh S, Esteban A, Fink GR, Ploegh HL,  
822 Sehrawat, S. 2018. Galectin-3 regulates gamma-herpesvirus specific CD8 T  
823 cell immunity. *iScience* 9, 101-119.
- 824 21. Rouse BT, Sehrawat S. 2010. Immunity and immunopathology to viruses: what  
825 decides the outcome? *Nat Rev Immunol* 10:514–526.
- 826 22. Galbraith SE, McQuaid S, Hamill L, Pullen L, Barrett T, Cosby SL. 2002.  
827 Rinderpest and peste des petits ruminants viruses exhibit neurovirulence in  
828 mice. *J Neurovirol* 8:45–52.
- 829 23. Sahoo M, Dinesh M, Thakor JC, Baloni S, Saxena S, Shrivastava S, Dhama K,  
830 Singh K, Singh R. 2020. Neuropathology mediated through caspase dependent  
831 extrinsic pathway in goat kids naturally infected with PPRV. *Microb Pathog*  
832 140J vi:103949.
- 833 24. Saravanan, S. Singh, RP. Balamurugan, P. Saravanan, S. Sen, Sahay, B. Sarkar,  
834 J . Singh R. 2007. Production and Characterization of Neutralizing Monoclonal

- 835 Antibodies Against Haemagglutinin Protein of peste des petits ruminants (PPR)  
836 Vaccine Virus. *J Appl Anim Res* 32:207–210.
- 837 25. Lund JM, Hsing L, Pham TT, Rudensky AY. 2008. Coordination of early  
838 protective immunity to viral infection by regulatory T cells.  
839 *Immunity* 30:320(5880):1220-4.
- 840 26. Van Kaer, L. Ashton-Rickardt, P.G. Ploegh, H.L., Tonegawa S. 1992. TAP1  
841 mutant mice are deficient in antigen presentation, surface class I molecules,  
842 and CD4-8+ T cells. *Cell* 71:1205–1214.
- 843 27. Kumar N, Barua S, Riyesh T, Tripathi BN. 2017. Advances in peste des petits  
844 ruminants vaccines. *Vet Microbiol* 206:91–101.
- 845 28. Galani IE, Triantafyllia V, Eleminiadou E-E, Koltsida O, Stavropoulos A,  
846 Manioudaki M, Thanos D, Doyle SE, Kotenko S V, Thanopoulou K. 2017.  
847 Interferon- $\lambda$  mediates non-redundant front-line antiviral protection against  
848 influenza virus infection without compromising host fitness. *Immunity* 46:875–  
849 890.
- 850 29. Crotta, S. Davidson, S. Mahlakoiv, T. Desmet, CJ. Buckwalter, MR. Albert,  
851 ML. Staeheli, P. Wack A. 2013. Type I and Type III Interferons Drive  
852 Redundant Amplification Loops to Induce a Transcriptional Signature in  
853 Influenza-Infected Airway Epithelia. *PLoS Pathog* 9:e1003773.
- 854 30. Wang, Y. Swiecki, M. Cella, M. Alber, G. Schreiber, RD. Gilfillan, S. Colonna  
855 M. 2012. Timing and magnitude of type I interferon responses by distinct  
856 sensors impact CD8 T cell exhaustion and chronic viral infection. *Cell Host*  
857 *Microbe* 11:631–42.
- 858 31. Ng CT, Sullivan BM, Teijaro JR, Lee AM, Welch M, Rice S, Sheehan KC,  
859 Schreiber RD, Oldstone M. 2015. Blockade of interferon Beta, but not

- 860           interferon alpha, signaling controls persistent viral infection. *Cell Host Microbe*  
861           17:653–61.
- 862   32.   Nakanishi Y, Lu B, Gerard C, Iwasaki A. 2009 CTL mobilization to virus-  
863           infected tissue requires CD4+ T cell help. *Nature* 26; 462(7272): 510–513.
- 864   33.   Veillette A. 2006. Immune regulation by SLAM family receptors and SAP-  
865           related adaptors. *Nat Rev Immunol* 6:56–66.
- 866   34.   Sehrawat S, Kumar D, Rouse BT. 2018. Herpesviruses: Harmonious Pathogens  
867           but Relevant Cofactors in Other Diseases? *Front Cell Infect Microbiol* 8:177.
- 868   35.   Ahmed R, Kaech SM. 2001. Memory CD8+ T cell differentiation: initial  
869           antigen encounter triggers a developmental program in naïve cells. *Nat*  
870           *Immunol* 2:415–422.
- 871   36.   Flynn KJ, Belz GT, Altman JD, Ahmed R, Woodland DL, Doherty PC. 1998.  
872           Virus-specific CD8+ T cells in primary and secondary influenza pneumonia.  
873           *Immunity* 8:683–691.
- 874   37.   Rammensee H-G, Bachmann J, Emmerich NPN, Bachor OA, Stevanović S.  
875           1999. SYFPEITHI: database for MHC ligands and peptide motifs.  
876           *Immunogenetics* 50:213–219.
- 877
- 878

879 **Figure legends**

880 **Figure 1. PPRV pulsed murine macrophages mount a rapid IFN response.**

881 Murine macrophages (RAW macrophages and primary bone marrow derived  
882 macrophages) were pulsed with PPRV at low (1:1) and high (1:10) multiplicity of  
883 infections (MOI) to measure IFN $\alpha$ , IFN $\beta$  and IFN $\gamma$  response. The PPRV exposed  
884 cells were collected at different times to isolate total RNA. cDNA synthesized was  
885 measured for the expression of different IFNs by RT-qPCR. A-C. Fold change in the  
886 expression of IFN $\alpha$ ,  $\beta$  and  $\gamma$  is shown by bar diagrams at 15min, 30min, 1hr and 6hr.  
887 D-F. BMDMs similarly analyzed for the expression of IFN $\alpha$ ,  $\beta$  and  $\gamma$  at indicated  
888 time points. Bar diagrams show fold change in the expression of IFNs. The  
889 experiments were repeated six times. One way ANOVA test was used for  
890 determining the statistical significance and p values are represented as following; p  
891 < 0.05 \*, p < 0.01 \*\*, p < 0.001\*\*\*.

892 **Figure 2. IFNR KO mice are susceptible to PPRV infection.** A. The schematic of  
893 experiments is shown. IFNR KO mice were i.p. infected with indicated doses of  
894 PPRV and the survival analysis (B) and percentage change in body weight of mice  
895 (C) from each group is shown. The level of statistical significance was determined by  
896 Gehan-Breslow-Wilcoxon test and one-way ANOVA, respectively. Each data point  
897 in the graph represents the average percent change in body weight at the indicated  
898 dpi. Control animals were not infected with PPRV. D. Fluorescent microscopic  
899 images show the presence of PPRV antigens in brain tissues of the infected IFNR  
900 KO mice as detected by anti-PPRV (H) mAbs. E. Bar diagrams show PPRV titres as  
901 represented by log<sub>10</sub> PFU/g of tissue when measured by plaque forming assays using  
902 brain tissues of i.p., infected IFNR KO mice administered with varying doses. F-G.  
903 IFNR KO mice were i.p. infected with  $1.5 \times 10^6$  PFU of PPRV and different organs

904 were collected 4dpi to measure the presence of viral antigens (F) and replicating  
905 virus (G) in different organs. F. Fluorescent microscopic images show the presence  
906 of virus antigens in brain tissues of PPRV infected IFNR KO mice as detected by  
907 anti-PPRV (H) protein mAbs. G. Virus titers as represented by log<sub>10</sub> PFU/g of tissue  
908 in heart, lung and liver is shown. Data represents the mean ± SD of three replicates  
909 of tissue samples. H. Virus titers as represented by log<sub>10</sub> PFU/g of tissue are shown  
910 in different organs of IFNR KO mice infected with 1PFU of PPRV. I.  
911 Histopathological changes in virus infected brain sections are shown. The  
912 experiments were repeated three times with similar results. B-I. One way ANOVA  
913 test was used for determining the statistical significance values and are represented  
914 as following;  $p < 0.05$  \*,  $p < 0.01$  \*\*,  $p < 0.001$  \*\*\*. J-M. Innate immune cells  
915 were analyzed in the brain tissues of PPRV infected IFNR KO mice. The single cell  
916 suspensions prepared from brain samples were stained with neutrophils  
917 (CD11b<sup>+</sup>Gr1<sup>+</sup>) and macrophages (CD11b<sup>+</sup>F4/80<sup>+</sup>). J. Representative FACS plots  
918 show the frequencies of CD11b<sup>+</sup>Gr1<sup>+</sup> cells in control and PPRV infected mice. K.  
919 Bar diagrams show the cumulative data. L. Representative FACS plots show the  
920 frequencies of CD11b<sup>+</sup>F4/80<sup>+</sup> cells in control and PPRV infected mice. M. Bar  
921 diagrams show the cumulative data. The experiments were repeated two times.  
922 Student t test were used form determining the significance levels in control and  
923 infected groups.  $p < 0.05$  \*,  $p < 0.01$  \*\*,  $p < 0.001$  \*\*\*.

924 **Figure 3. Determining PPRV infectivity of innate immune cells in IFNR KO**  
925 **mice.** IFNR KO mice were i.p infected with 100PFU of PPRV and the expansion as  
926 well infectivity of innate immune cells was measured in spleen. A. Representative  
927 FACS plots show the frequencies of Gr1<sup>+</sup> cells among live cell gate in control and  
928 PPRV infected mice. B. Bar diagrams show cumulative data for the frequencies of

929 Gr1<sup>+</sup> cells in control and PPRV infected mice. C-E. Intracellular staining was  
930 performed as described in the material and methods sections to measure the presence  
931 of PPRV antigens in Gr1<sup>+</sup> cells using anti-PPRV (H) and anti-PPRV (N) protein  
932 antibodies. C. Representative overlaid histograms show the frequency of PPRV  
933 (H)<sup>+</sup>Gr1<sup>+</sup> cells. D. Representative histograms show the percentage of PPRV  
934 (N)<sup>+</sup>Gr1<sup>+</sup> cells. E. Bar diagrams show cumulative data as percent positive Gr1<sup>+</sup> PPRV  
935 (H)<sup>+</sup> and PPRV (N)<sup>+</sup> cells. F. Representative FACS plots show the frequencies of  
936 F4/80<sup>+</sup> cells among live cell gate in control and PPRV infected mice. G. Bar  
937 diagrams show cumulative data for the frequencies of F4/80<sup>+</sup> cells in control and  
938 PPRV infected mice. H-J. Intracellular staining was performed as described in the  
939 materials and method section to measure the presence of PPRV antigens in Gr1<sup>+</sup> cells  
940 using anti-PPRV H protein and anti-PPRV-N protein mAbs. H. Representative  
941 overlaid histograms show the frequency of PPRV (H)<sup>+</sup>F4/80<sup>+</sup> cells. I. Representative  
942 histograms showing the percentage of PPRV (N)<sup>+</sup>F4/80<sup>+</sup> cells. J. Bar diagrams show  
943 the percentage of F4/80<sup>+</sup> cells expressing PPRV (H) and PPRV (N) proteins. K.  
944 Representative FACS plots show the frequencies of CD11c<sup>+</sup> cells among live cell  
945 gate in control and PPRV infected mice. L. Bar diagrams show cumulative data for  
946 the frequencies of CD11c<sup>+</sup> cells in control and PPRV infected mice. M-O.  
947 Intracellular staining was performed as described in the material and methods  
948 sections to measure the presence of PPRV antigens in CD11c<sup>+</sup> cells using anti-PPRV  
949 H protein and anti-PPRV-N protein antibodies. M. Representative overlaid  
950 histograms show the frequency of PPRV (H)<sup>+</sup>CD11c<sup>+</sup> cells. N. Representative  
951 histograms show the percentage of PPRV (N)<sup>+</sup>CD11c<sup>+</sup> cells. O. Bar diagrams show  
952 the percentage of F4/80<sup>+</sup> cells expressing PPRV (H) and PPRV (N) proteins. The  
953 experiments were repeated two times with four animals in each group. Different



954 groups were analyzed by two-way ANOVA using Sidak's multiple comparison test.

955 Statistical significance values are represented as following;  $p < 0.05$  \*,  $p < 0.01$  \*\*,

956  $p < 0.001$ \*\*\*.

957 **Figure 4. Innate immune cells serve as the carrier of PPRV to brain tissues.**

958 FACS sorted neutrophils, macrophages and dendritic cells from CD45.1<sup>+</sup> C57BL/6

959 mice were pulsed with PPRV and after washing transferred into CD45.2<sup>+</sup> IFNR KO

960 mice. At 4dpi, brain tissue staining was done with CD45.1 and CD45.2 markers. A.

961 Representative FACS plots depict the frequencies of donor cells in processed brain

962 tissue suspensions. B. Bar diagrams shown the cumulative frequencies of frequencies

963 expanded donor cells recovered from brain suspensions. For each group of recipients

964 three animals were used and the experiments were performed two times. C. FACS

965 sorted macrophages (F4/80<sup>+ve</sup>), neutrophils (Gr1<sup>+ve</sup>) and dendritic cells (CD11c<sup>+ve</sup>)

966 from CD45.1<sup>+</sup> C57BL/6 mice were pulsed with PPRV for 1hr and transferred in

967 IFNR KO mice. The recipients were monitored for their body weights and morbidity.

968 D-E. FACS sorted macrophages (F4/80<sup>+ve</sup>), neutrophils (Gr1<sup>+ve</sup>) and dendritic cells

969 (CD11c<sup>+ve</sup>) from CD45.1<sup>+</sup> C57BL/6 mice were pulsed with PPRV for 1hr. After

970 washings, cells were stained to determine the presence of surface or intracellular

971 viral antigens. Representative FACS plots show PPRV (H)<sup>+ve</sup> cells for each cell type.

972 For gating FACS plots, fluorescent minus one (FMO) parameter were used. E. Bar

973 diagrams show cumulative data for PPRV<sup>+ve</sup> cells. The experiments were repeated

974 two more times. One way ANOVA or Student t test were done for determining the

975 statistical significance values and are represented as following;  $p < 0.05$  \*,  $p < 0.01$

976 \*\*,  $p < 0.001$ \*\*\*.

977 **Figure 5. IFNR KO mice infected with PPRV develop lung pathologies and**

978 **mount innate as well as adaptive immune responses.** A. IFNR KO and WT

979 C57BL/6 mice were infected with varying doses of PPRV via intranasal route and  
980 animals were analyzed for their survival, change in body weights. The level of  
981 statistical significance was determined by Gehan-Breslow-Wilcoxon test and one-  
982 way ANOVA, respectively. Terminally anaesthetized animals were analyzed for  
983 measuring the cellular infiltration in BAL, lungs and lymphoid organs at 7dpi. The  
984 FACS plots for gating strategy and representative plots from different groups of  
985 animals are shown in supplementary Fig S3-6. B. Percent change in body weights of  
986 WT and IFNR KO mice infected with PPRV is shown. C-E. The frequencies of  
987 leukocytes (CD45<sup>+</sup> cells) are shown in the BAL (C), lungs (D) and brain tissues (E)  
988 of infected WT and IFNR KO mice. F. Bar diagrams show the percentage of CD4<sup>+</sup>  
989 and CD8<sup>+</sup> T cells in the spleens of infected animals. G-J. Frequencies of  
990 macrophages (CD11b<sup>+</sup>F4/80<sup>+</sup>) (G), neutrophils (CD11b<sup>+</sup>Gr1<sup>+</sup>) (H), NK cells  
991 (NK1.1<sup>+</sup>) (I) and T cells (J) are shown in the BAL of infected animals by bar  
992 diagrams. K-N. Frequencies of macrophages (CD11b<sup>+</sup>F4/80<sup>+</sup>) (K), neutrophils  
993 (CD11b<sup>+</sup>Gr1<sup>+</sup>) (L), NK cells (NK1.1<sup>+</sup>) (M) and T cells (N) are shown in the lungs of  
994 infected animals by bar diagrams. O-P. Frequencies of macrophages  
995 (CD11b<sup>+</sup>F4/80<sup>+</sup>) (O) and neutrophils (CD11b<sup>+</sup>Gr1<sup>+</sup>) (P) are shown in the lungs of  
996 infected animals by bar diagrams. Q-V. Frequencies of macrophages  
997 (CD11b<sup>+</sup>F4/80<sup>+</sup>) (Q), neutrophils (CD11b<sup>+</sup>Gr1<sup>+</sup>) (R) and the phenotypic  
998 characterization CD4<sup>+</sup> T cells (S and T) and CD8<sup>+</sup> T cells (U-V) for the indicated  
999 markers are shown in the MLN of infected animals by bar diagrams. W-Z.  
1000 Frequencies of macrophages (CD11b<sup>+</sup>F4/80<sup>+</sup>) (W) and neutrophils (CD11b<sup>+</sup>Gr1<sup>+</sup>)  
1001 (X) and NK cells (Y) are shown in the spleen of infected animals by bar diagrams. Z.  
1002 Activation profile of splenic CD4<sup>+</sup> T cells is shown by bar diagram. The experiments  
1003 were repeated three times. The data was analyzed by two-way ANOVA was

1004 performed for determining the statistical significance values. The levels of  
1005 significance are represented as following;  $p < 0.05$  \*,  $p < 0.01$  \*\*,  $p < 0.001$  \*\*\*.

1006 **Figure 6. WT CD8<sup>+</sup> T cells delay mortality in PPRV infected IFNR KO mice.** A

1007 schematic of the experiments is shown.  $5 \times 10^6$  of CD8<sup>+</sup> T cells from naïve or  
1008 previously PPRV infected WT mice were transferred into IFNR KO mice. Next day,

1009 the recipient animals were infected with PPRV ( $10^4$ PFU). The disease progression,

1010 survival and cellular analysis of immune cells were performed. B. The survival in

1011 different groups of animals is shown. The results were analyzed by Gehan-Breslow-

1012 Wilcoxon test. C. Percent change in body weight of mice from each group is shown.

1013 The level of statistical significance was determined by Two-way ANOVA . D-E. The

1014 frequencies of leukocytes (CD45<sup>+</sup> cells) in BAL (D) and lungs (E) of infected mice

1015 are shown by bar diagrams. F-G. The frequencies of macrophages (CD11b<sup>+</sup>F4/80<sup>+</sup>),

1016 neutrophils (CD11b<sup>+</sup>Gr1<sup>+</sup>), NK cells (NK1.1<sup>+</sup>) and T cells (both CD4<sup>+</sup> and CD8<sup>+</sup> T

1017 cells) are shown in the BAL (F) and lungs (G) of infected animals by bar diagrams.

1018 H. The frequencies of macrophages (CD11b<sup>+</sup>F4/80<sup>+</sup>), neutrophils (CD11b<sup>+</sup>Gr1<sup>+</sup>), NK

1019 cells (NK1.1<sup>+</sup>), T cells (CD4<sup>+</sup> and CD8<sup>+</sup> T cells) are shown in the MLNs of infected

1020 animals by bar diagrams. I. The phenotypic characterization CD4<sup>+</sup> T cells and CD8<sup>+</sup>

1021 T cells for the indicated markers are performed and the percent positive cells

1022 frequencies for the indicated markers are shown for MLN of infected animals by bar

1023 diagrams. J. The frequencies of macrophages (CD11b<sup>+</sup>F4/80<sup>+</sup>), neutrophils

1024 (CD11b<sup>+</sup>Gr1<sup>+</sup>), NK cells (NK1.1<sup>+</sup>), T cells (CD4<sup>+</sup> and CD8<sup>+</sup> T cells) are shown in the

1025 MLNs of infected animals by bar diagrams. K. The phenotypic characterization

1026 CD4<sup>+</sup> T cells and CD8<sup>+</sup> T cells for the indicated markers were performed and the

1027 frequencies of percent positive cells for the indicated markers are shown for spleen

1028 of infected animals by bar diagrams. The experiments were performed three times.

1029 The data was analysed by two-way ANOVA for determining the statistical  
1030 significance values and are represented as following;  $p < 0.05$  \*,  $p < 0.01$  \*\*,  $p <$   
1031  $0.001$  \*\*\*.

1032 **Figure 7. Molecular docking reveals docking of predicted peptides binding with**  
1033 **H-2K<sup>b</sup> and CLA-I.** A. High scoring peptides and their origin of PPRV protein are  
1034 tabulated. B. The docking scores of each peptide with H-2K<sup>b</sup> are shown. C. The  
1035 docking scores of each peptide with goat class I MHC (CLA-1) are shown by bar  
1036 diagrams. D. Selected peptides for further evaluation in *ex vivo* and *in vivo* assays  
1037 with their predicted molecular docking scores are shown. E. H-2K<sup>b</sup> and CLA-1 were  
1038 superimposed at RMSD value of 1.5Å. F. A comparative analysis of docking scores  
1039 of H-2K<sup>b</sup> and CLA-I for the predicted PPRV peptides is shown.

1040 **Figure 8. Immunogenicity of predicted peptides of PPRV was determined by *in***  
1041 ***vitro* assays.** A. An ELISA was performed for measuring the stabilization of H-2K<sup>b</sup>  
1042 monomers by synthetic peptides predicted to be immunogenic. The bar diagrams  
1043 show folds change values for H-2K<sup>b</sup> positive cells for the respective peptides as  
1044 compared to the control peptide. B. Representative overlay histograms for different  
1045 concentrations (50µg/ml, 25µg/ml, 12.5µg/ml and 6.25µg/ml) of indicated peptides  
1046 show their ability to stabilize surface MHC molecules. The values represent the  
1047 percent positive cells at different concentrations of peptides. C. Bar diagrams show  
1048 percent H-2K<sup>b</sup> positive cells for different concentrations of the indicated peptides. D.  
1049 Line graph shows log EC<sub>50</sub> values for different peptides for stabilizing H-2K<sup>b</sup> in  
1050 pulsed RMA/s cells. Student t test were performed for determining the statistical  
1051 significance values and are represented as following;  $p < 0.05$  \*,  $p < 0.01$  \*\*,  $p <$   
1052  $0.001$  \*\*\*.

1053 **Figure 9. PPRV infected and PPRV-peptide immunized WT C57BL/6 mice**  
1054 **expand virus-specific CD8<sup>+</sup> T cells.** A-C. WT C57BL/6 mice (n=5) were i.p.  
1055 infected with 5x10<sup>6</sup> PFU of PPRV at an interval of 7 days. The analysis of the  
1056 expanded cells was performed three days later by measuring the frequencies PPRV-  
1057 specific CD8<sup>+</sup> T cells by staining with arrays of tetramers. A. Representative FACS  
1058 plots shown the frequencies of class I MHC tetramer positive cells for the indicated  
1059 peptides. B. Frequencies of PPRV-specific CD8<sup>+</sup> T cells are shown by bar diagrams.  
1060 C. The number of cells/million of PBMCs is shown by bar diagrams. D-E. C57BL/6  
1061 mice (n=4) were immunized either with the cocktail of peptide (AILTFLFLL,  
1062 FMYLFLLGV, FSAGAYPLL and IGLVRDFGL) each with 5µg/mouse in complete  
1063 Freund's adjuvant via subcutaneous route. After two weeks, a second injection of the  
1064 same concentration was administered as an emulsion with incomplete Freund's  
1065 adjuvant. Three days later the frequencies of peptide specific CD8<sup>+</sup> T cells were  
1066 measured by tetramer staining of PBMCs. D. Representative FACS plots show the  
1067 frequencies of PPRV-specific CD8<sup>+</sup> T cells. E. The number of cells/million of  
1068 PBMCs is shown by bar diagrams. The experiments were repeated two times and the  
1069 statistical significance was measured by Student t test. p < 0.05 \*, p < 0.01 \*\*.

Figure 1

A

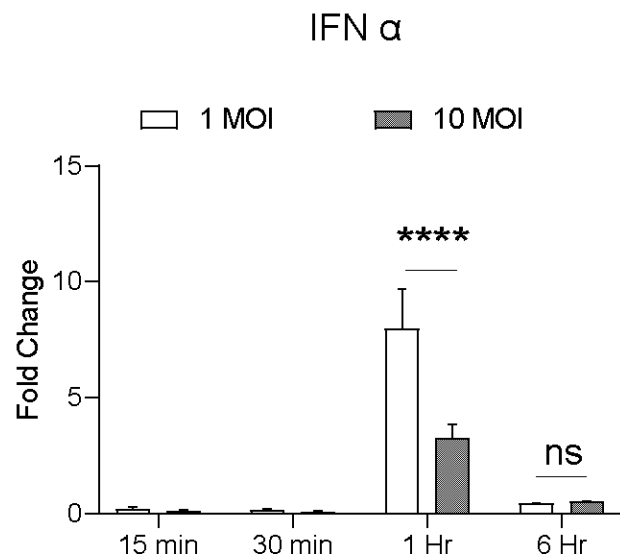

B

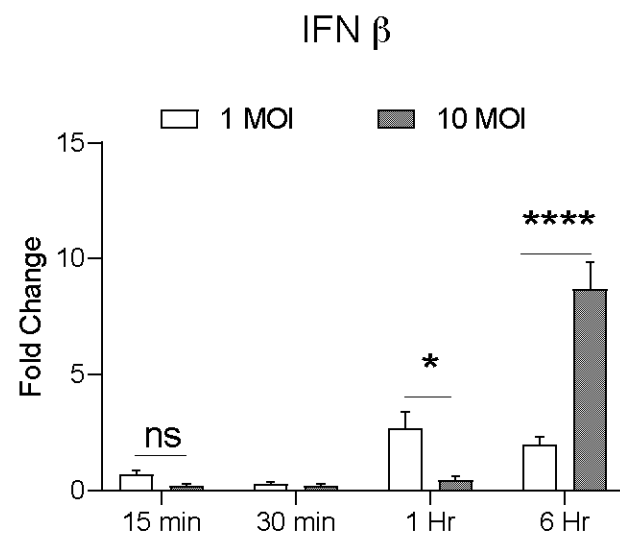

C

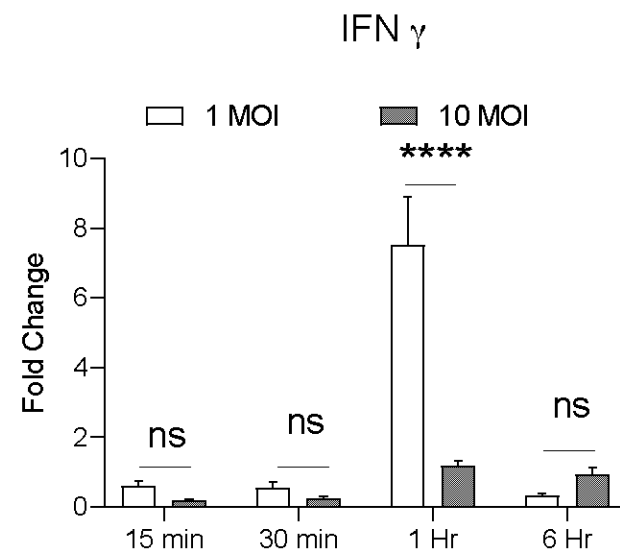

D

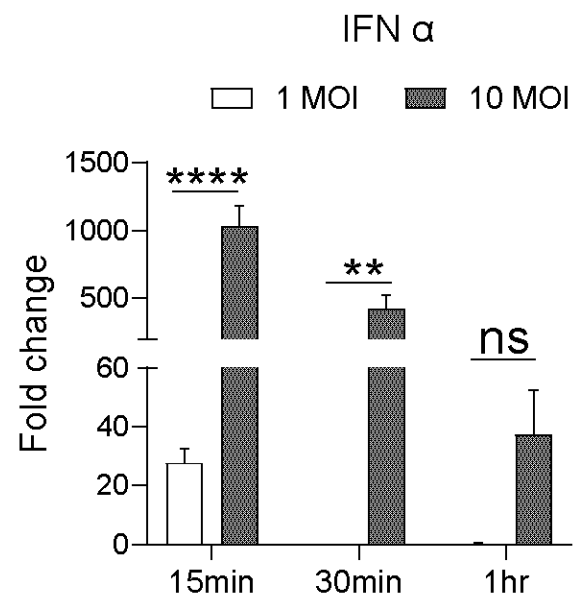

E

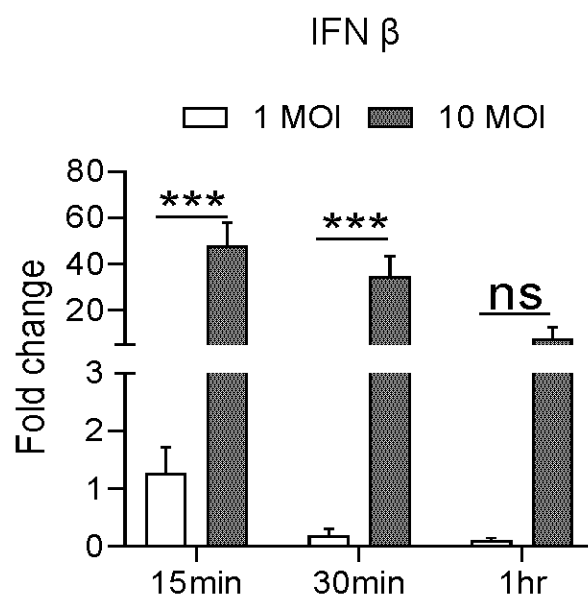

F

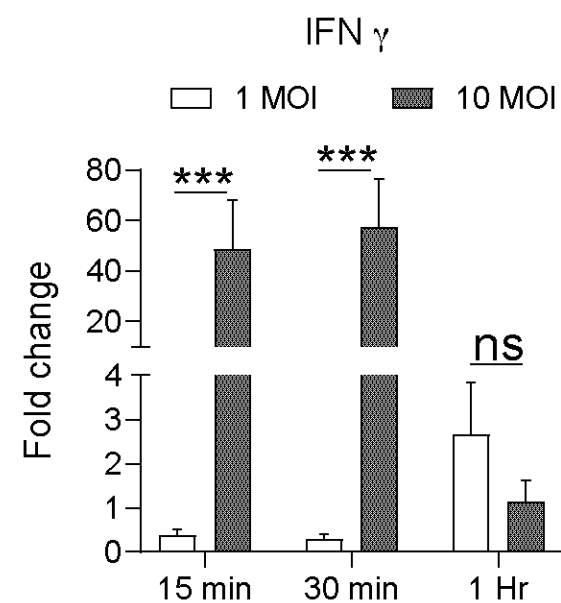

Figure 2

A

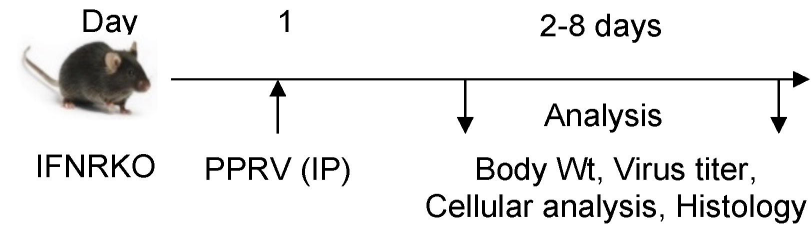

B

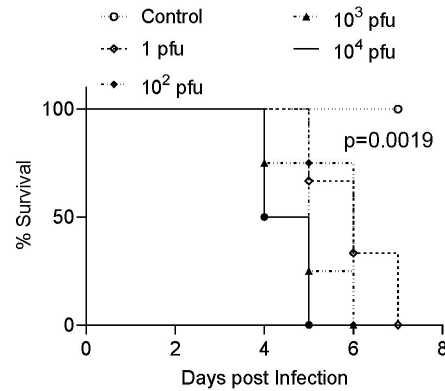

C

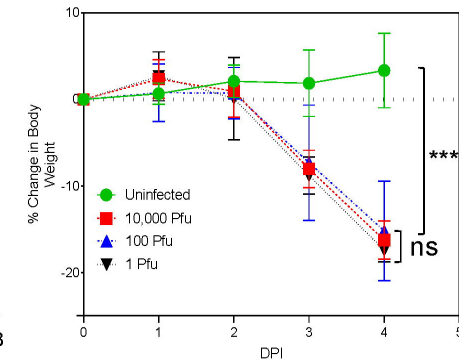

D

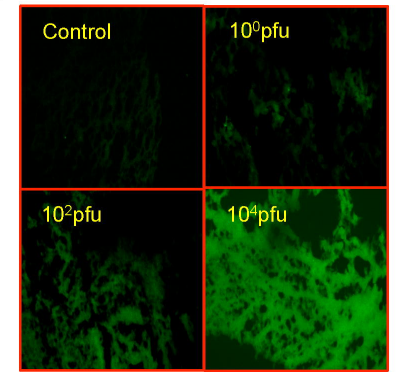

E

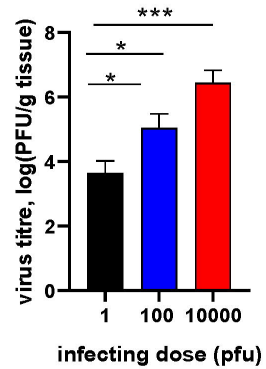

F

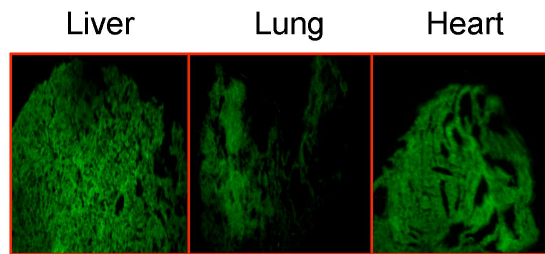

G

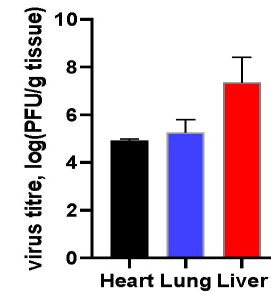

H

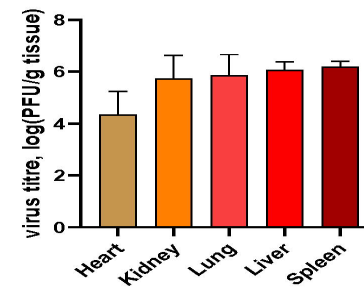

I

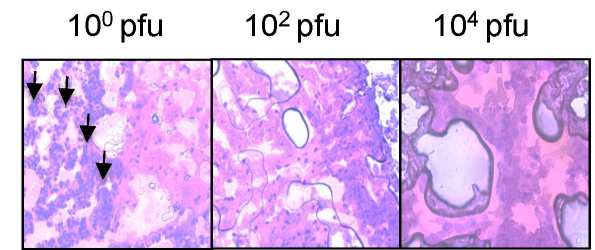

J

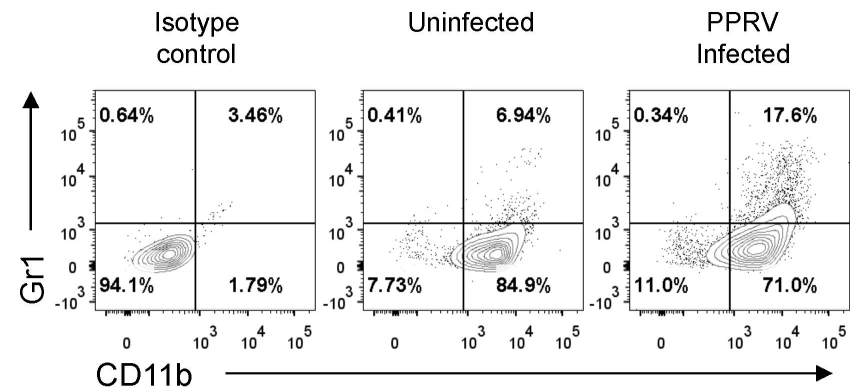

K

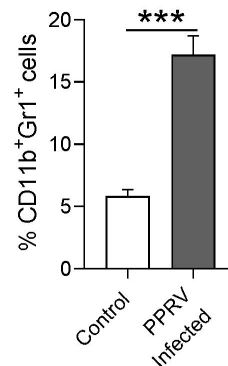

L

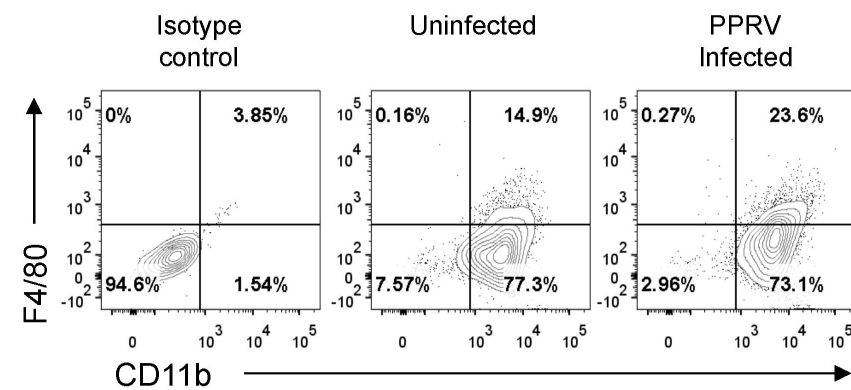

M

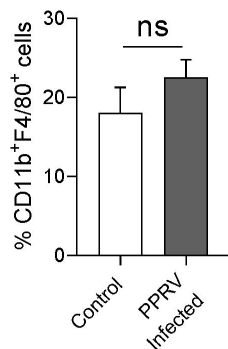

Figure 3

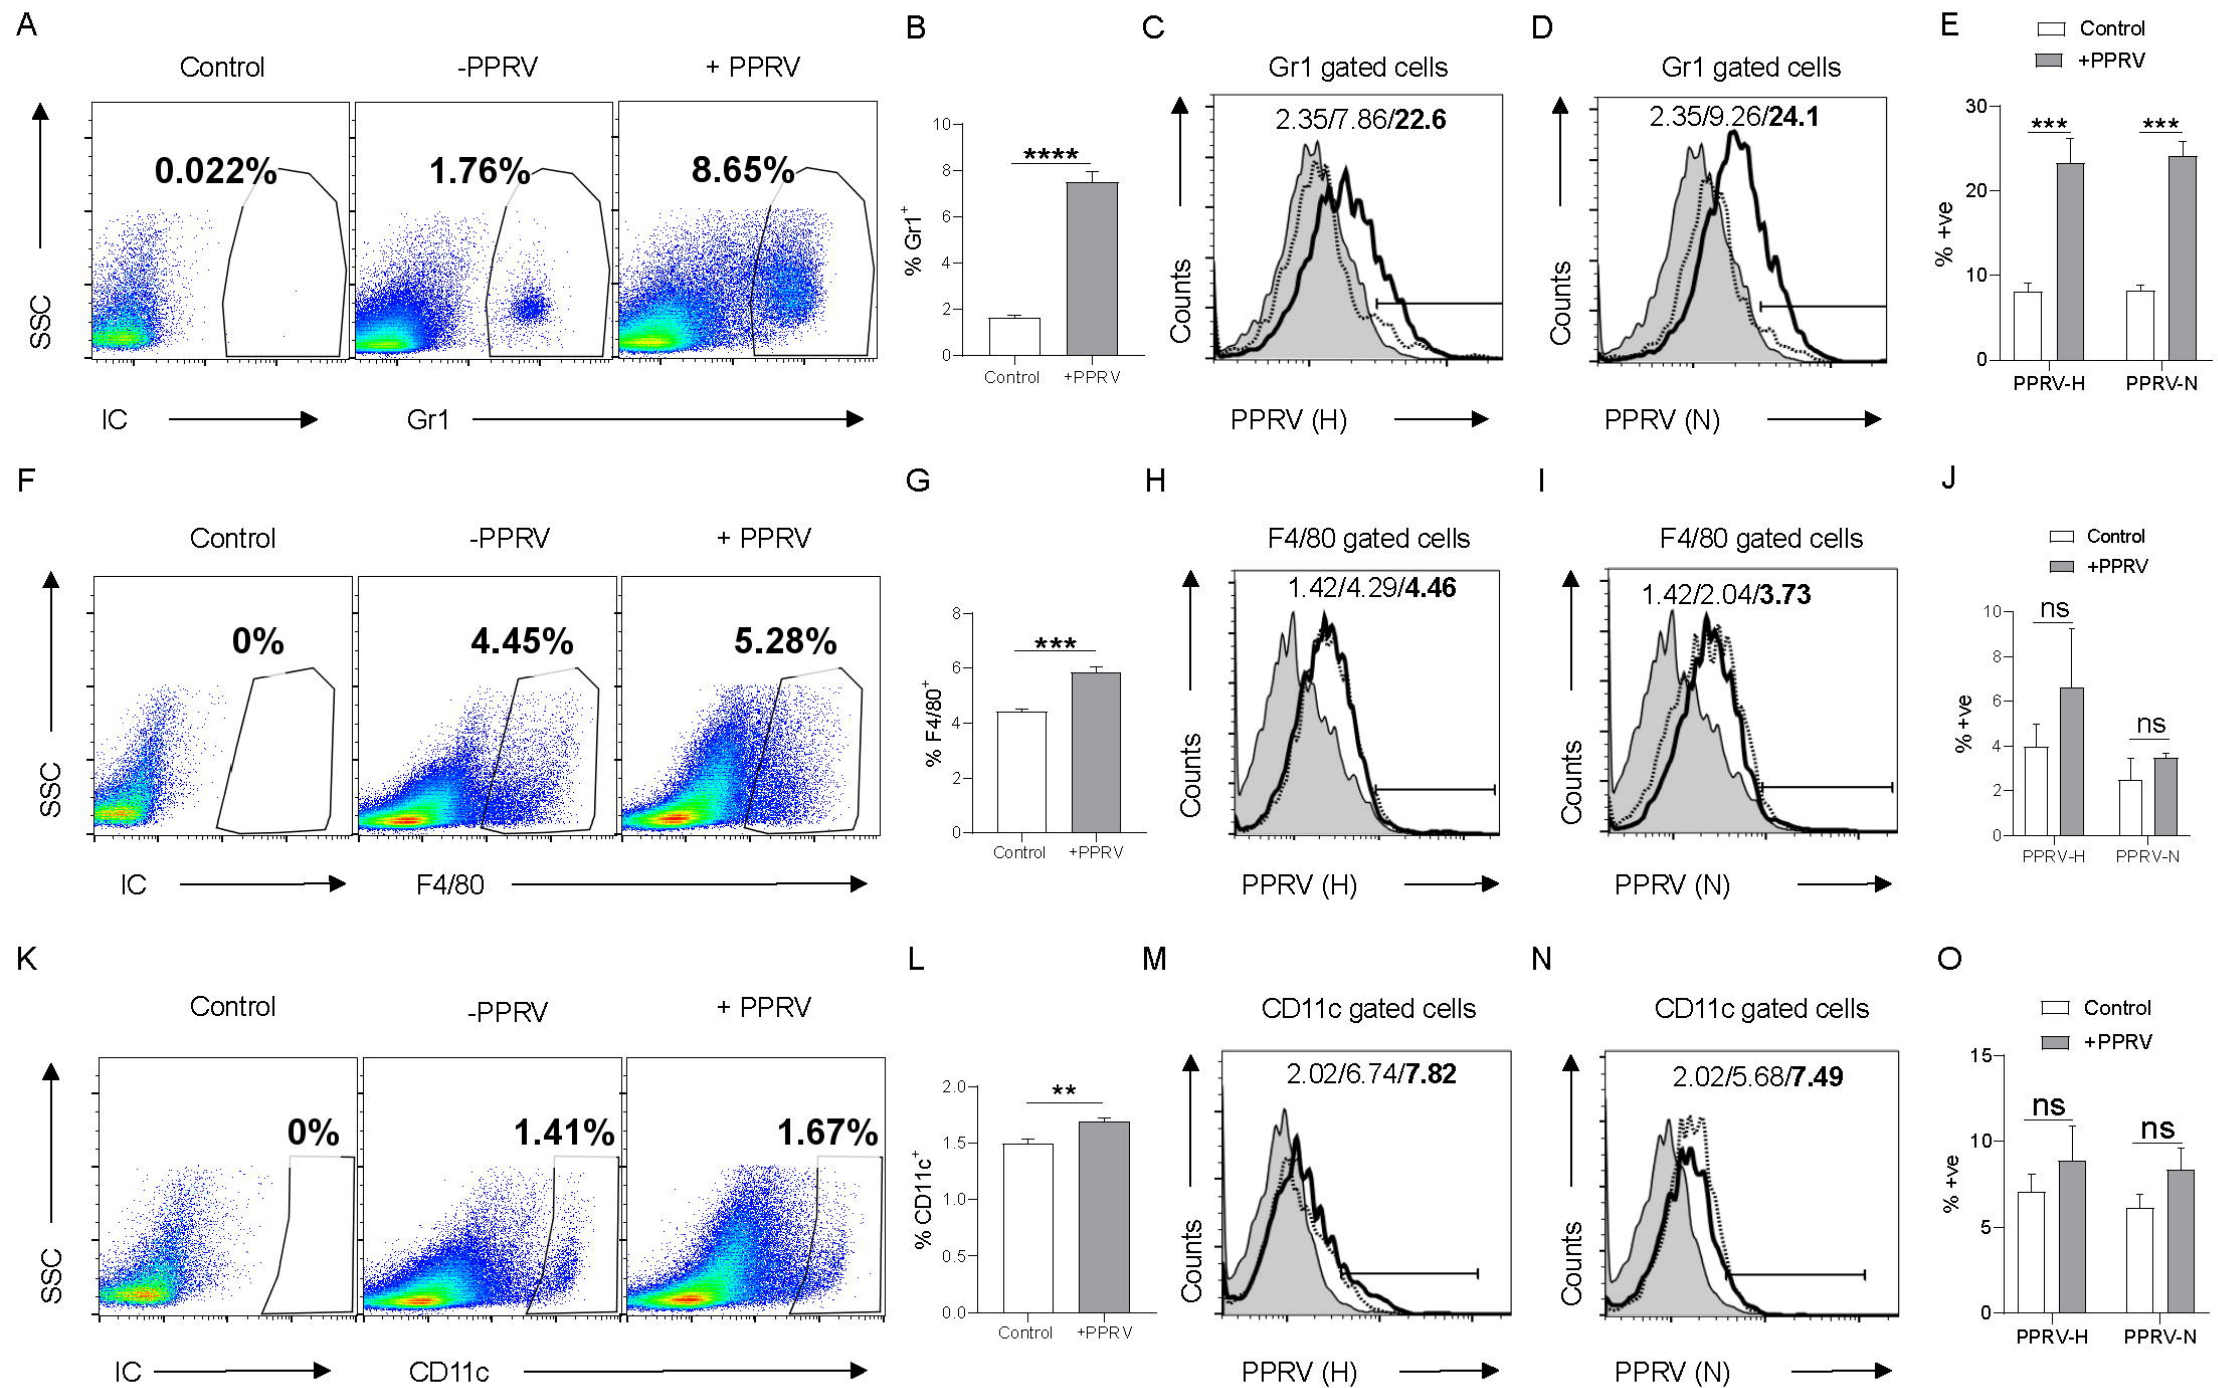



Figure 4

A

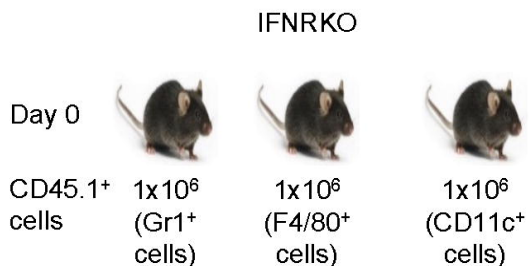

B

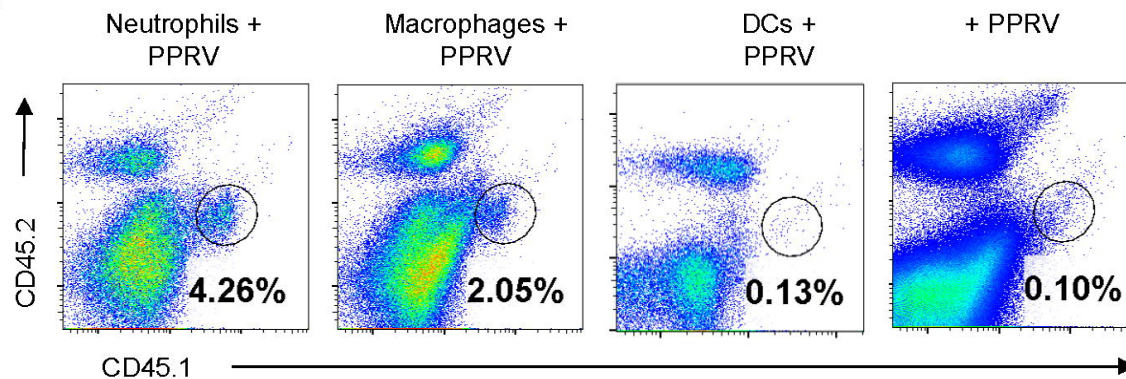

C

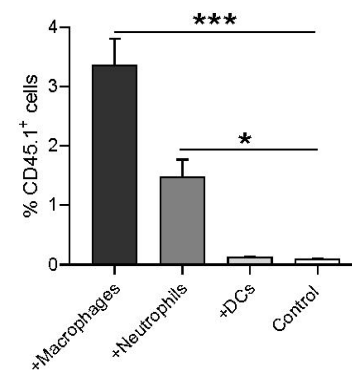

D

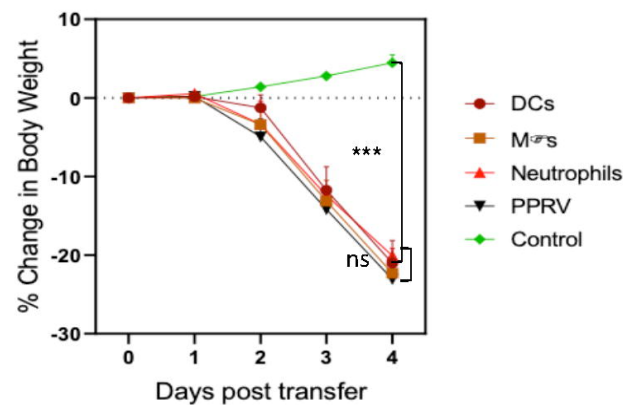

E

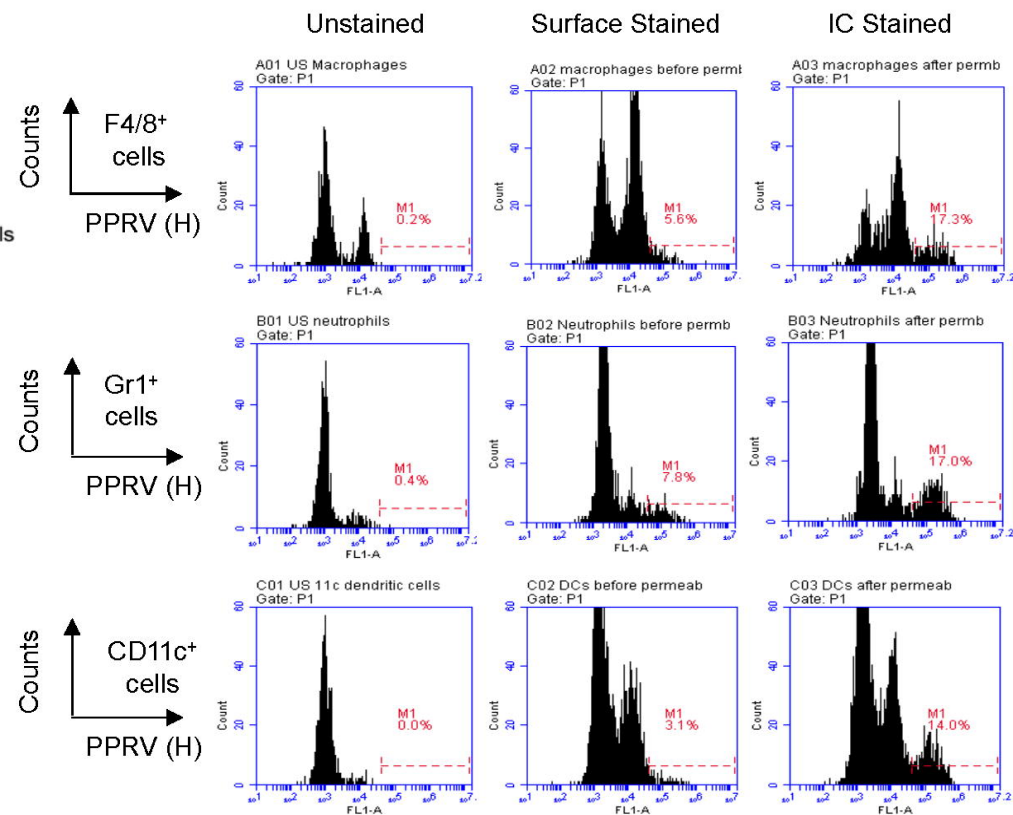

F

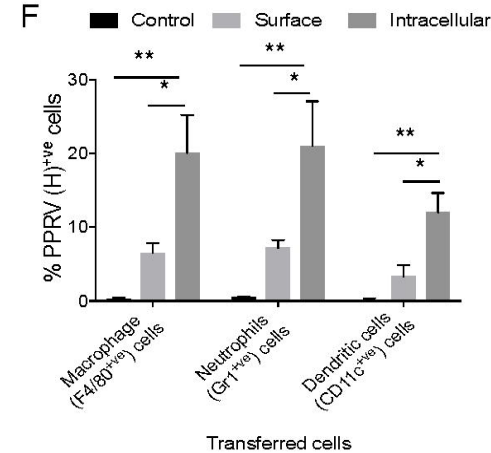

Figure 5

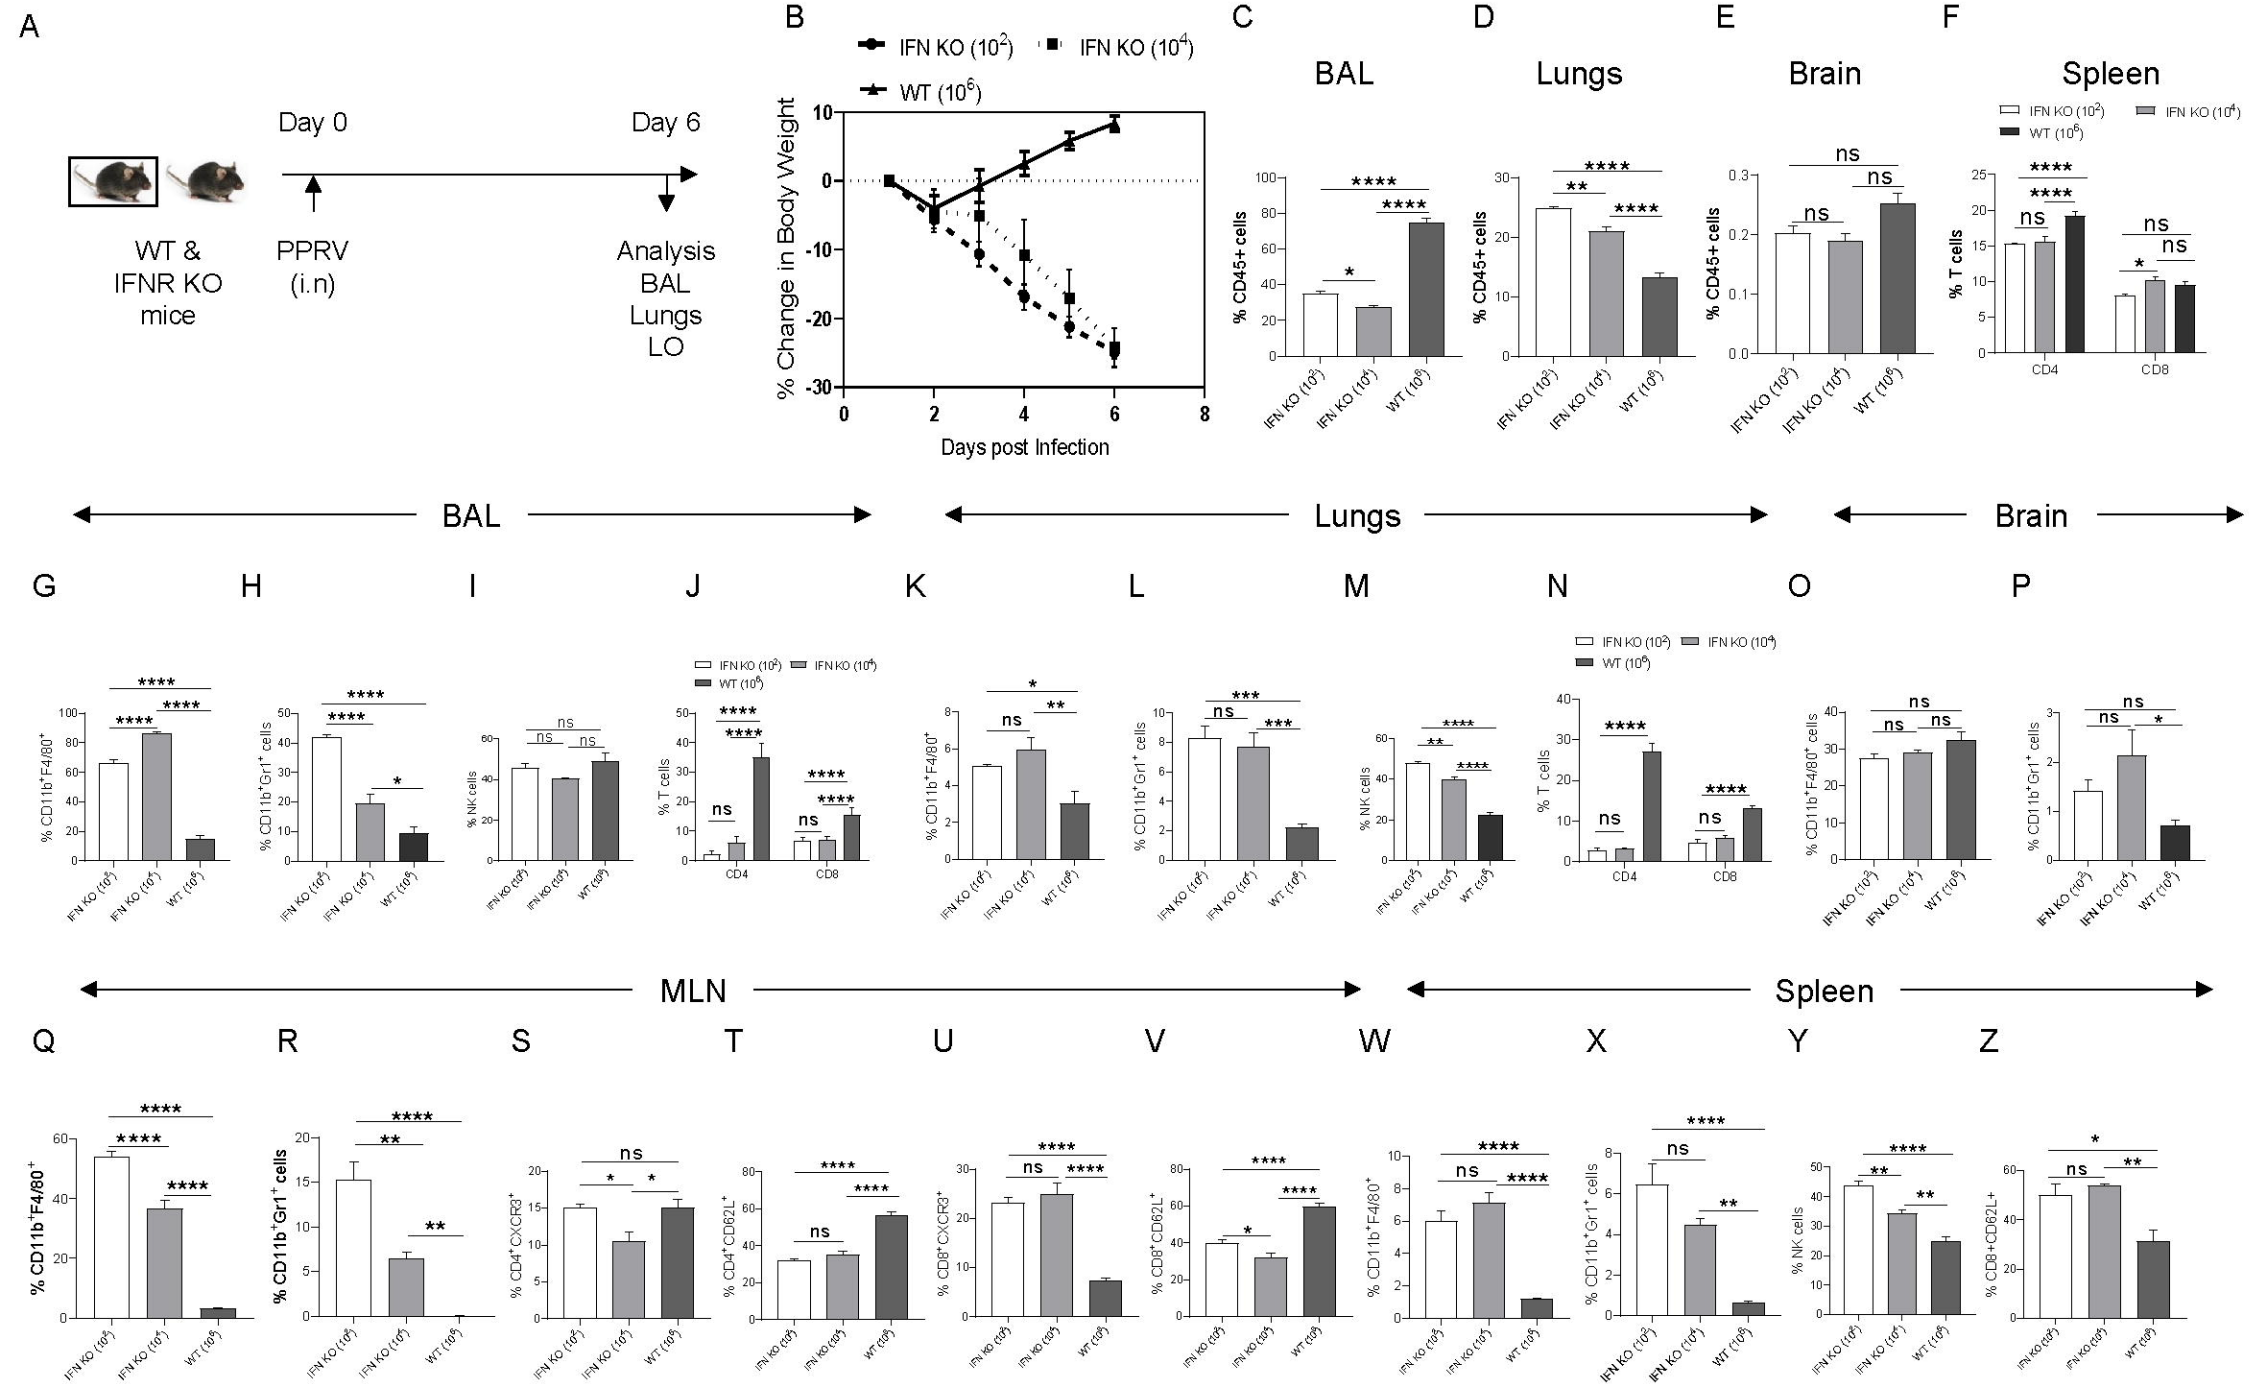

Figure 6

A

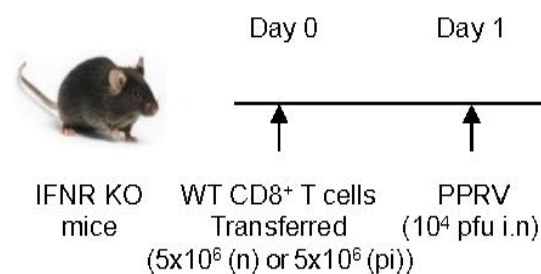

B

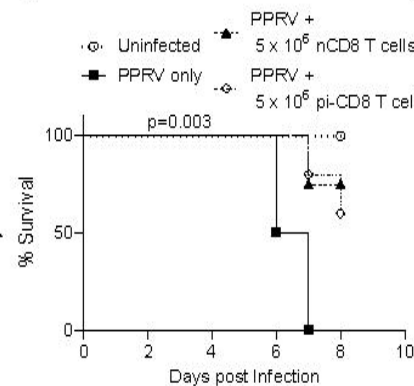

C

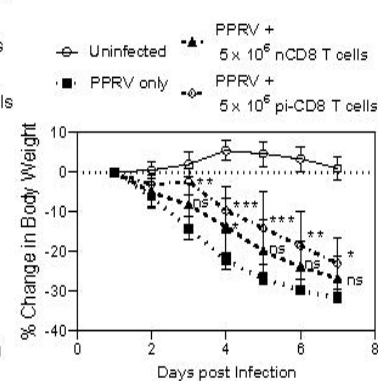

D

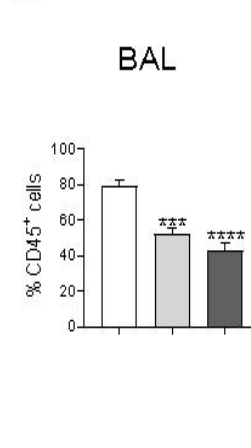

E

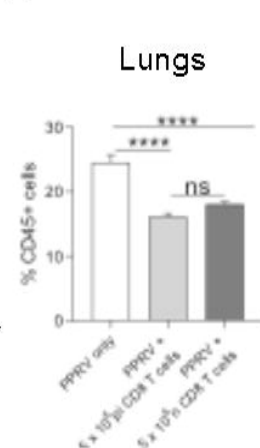

F(a)

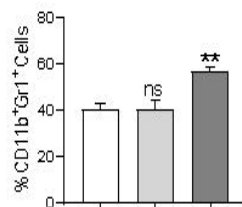

F(b)

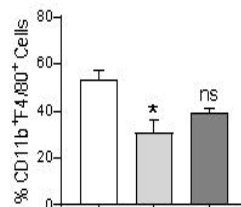

F(c)

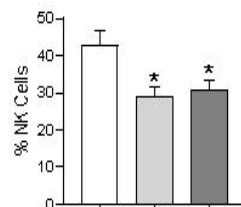

F(d)

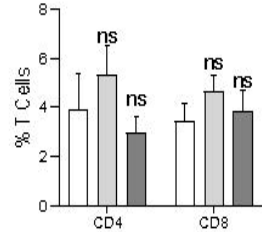

G(a)

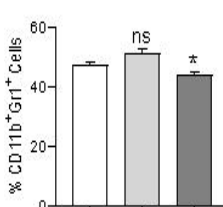

G(b)

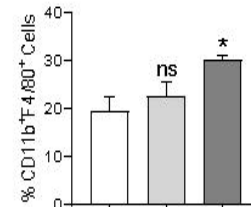

G(c)

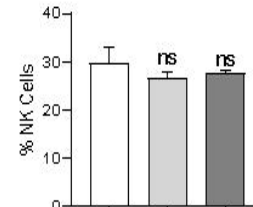

G(d)

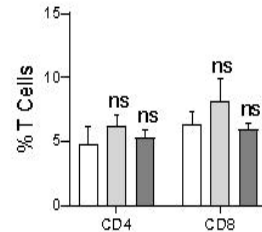

H(a)

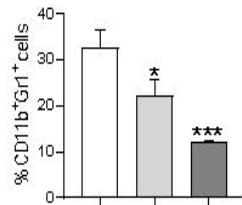

H(b)

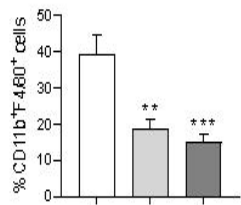

H(c)

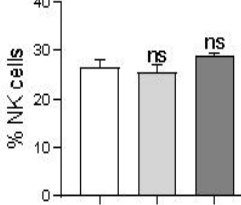

H(d)

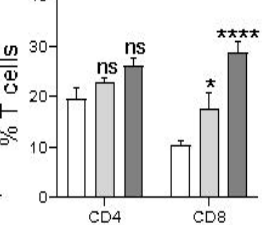

I(a)

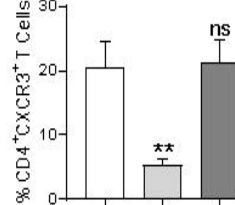

I(b)

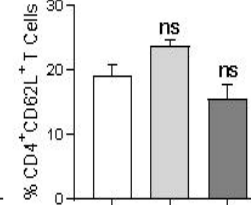

I(c)

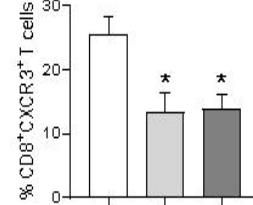

I(d)

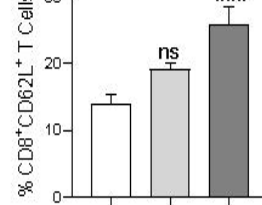

J(a)

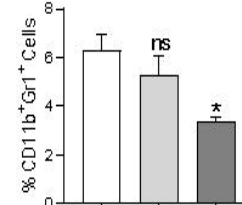

J(b)

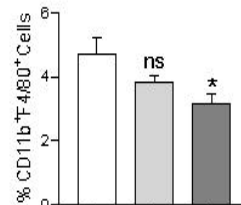

J(c)

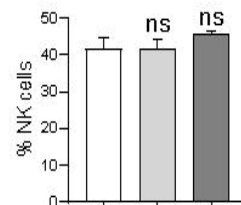

J(d)

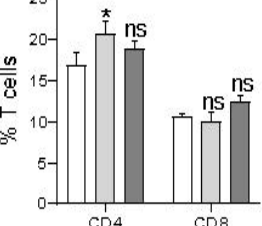

K(a)

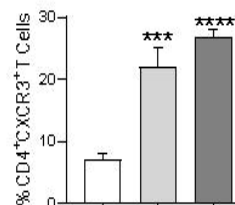

K(b)

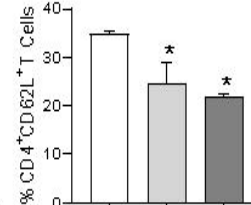

K(c)

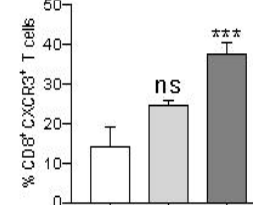

K(d)

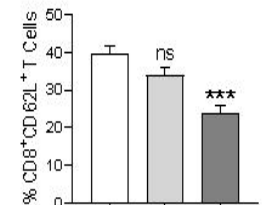

Figure 7

A

| PPRV PROTEIN         | H-2K <sup>b</sup>                   |
|----------------------|-------------------------------------|
| <b>Fusion</b>        | AILTFLFL<br>VAILTFLFL<br>SGGDFLAIL  |
| <b>Nucleocapsid</b>  | FSAGAYPLL<br>ASFILTIKF<br>SSITTRSRL |
| <b>Hemagglutinin</b> | VILDRERLV<br>IEHIFESPL<br>IGLVRDFGL |
| <b>Matrix</b>        | IVRRTAGV<br>VAFNILVTL<br>FMYLFLLG   |

B

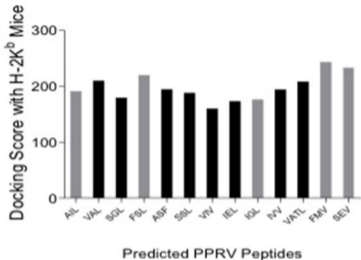

C

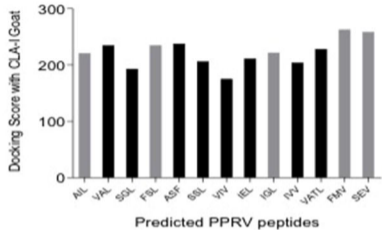

D

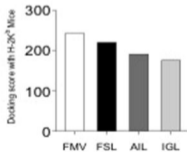

E

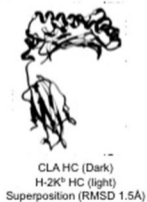

F

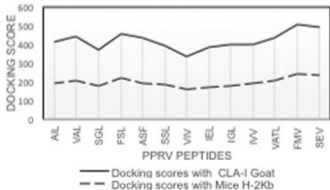

Figure 8

A

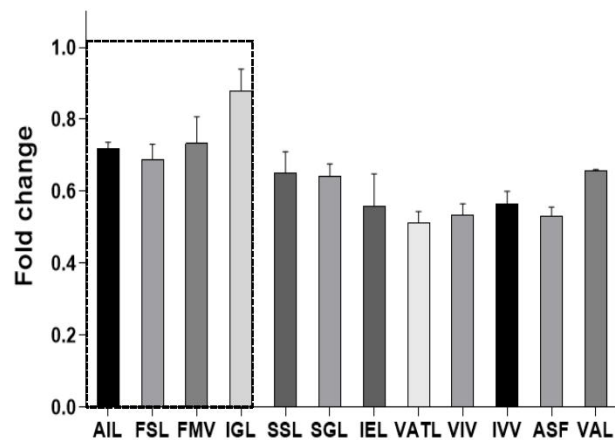

B

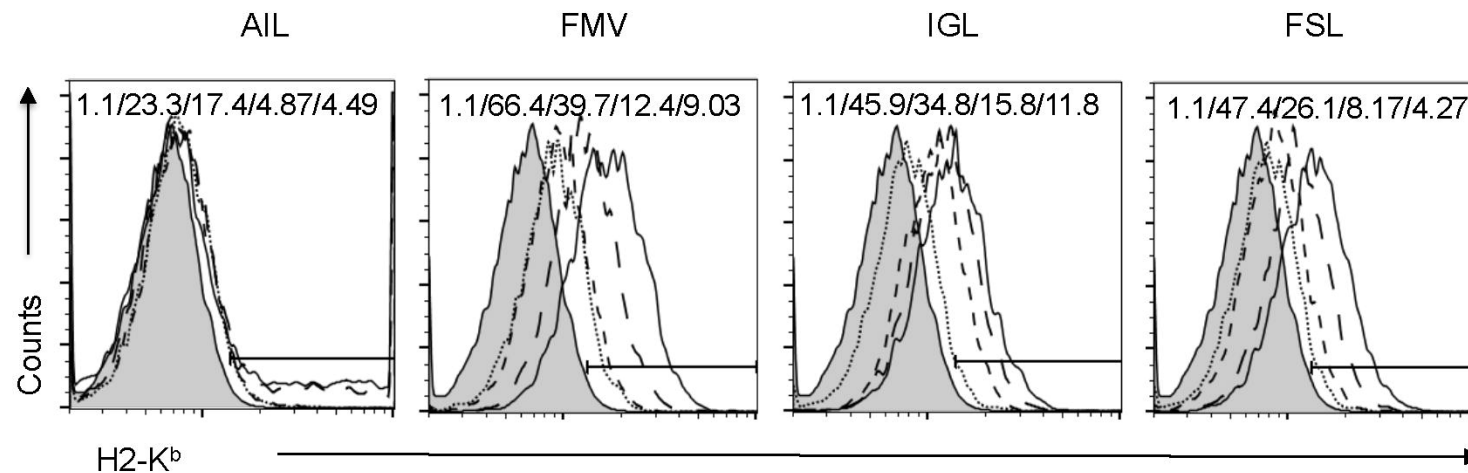

C

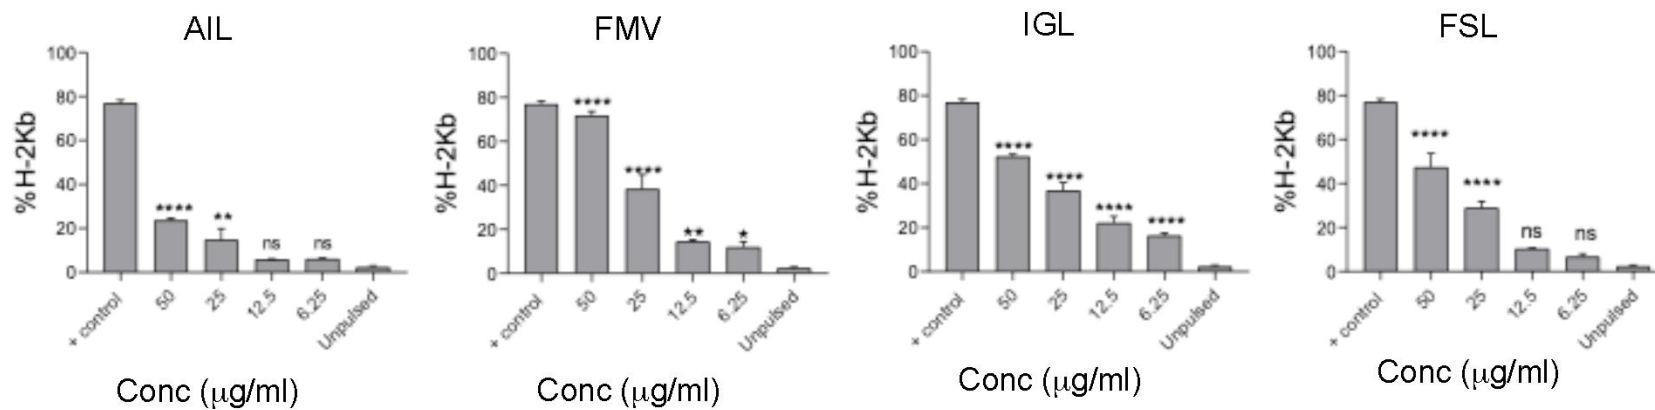

D

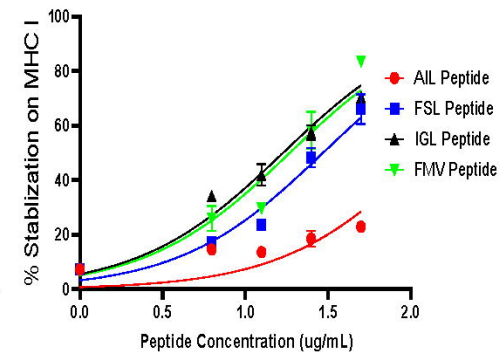

Figure 9

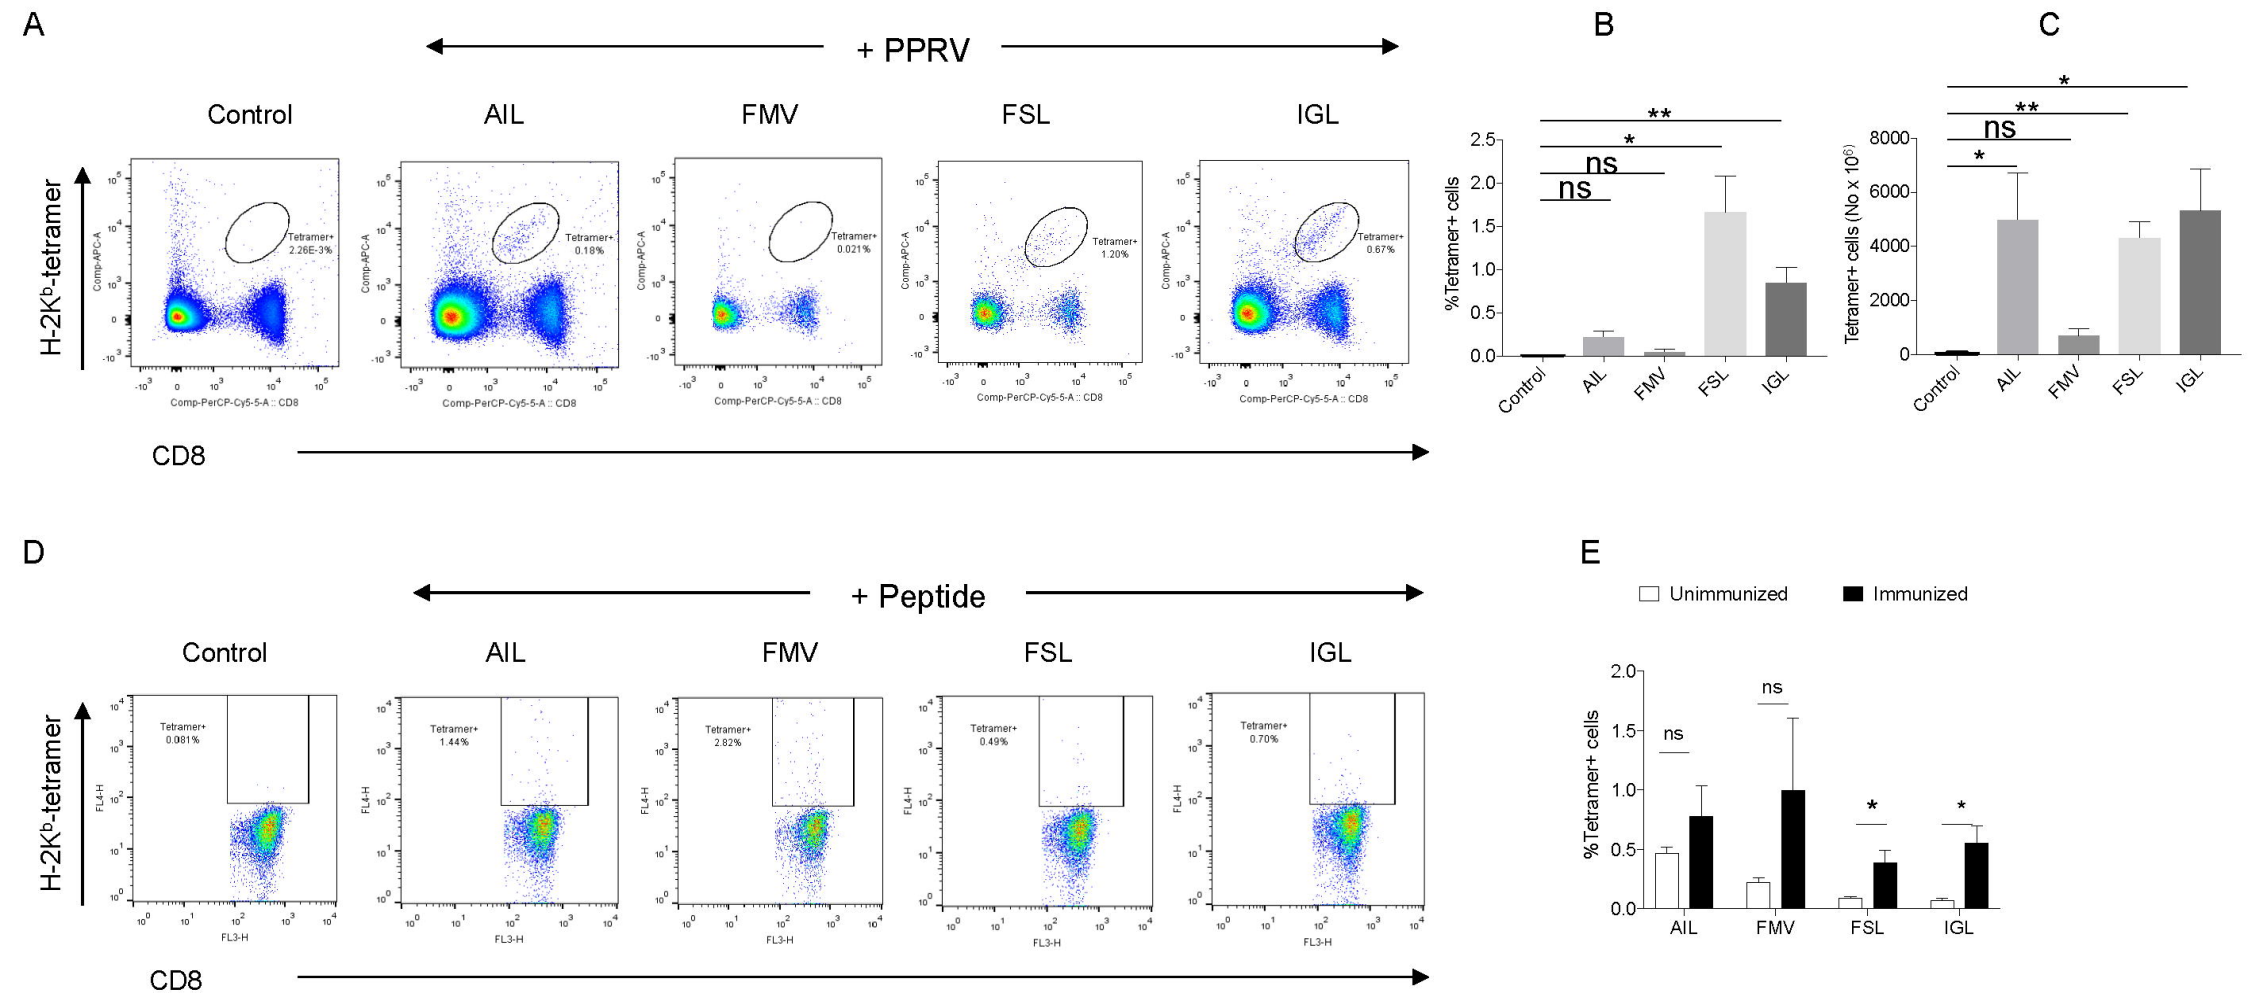

Source: https://biorxiv.org/content/10.1101/2020.10.27.358309v1.full.pdf
